## **Factors that affect protein abundance of the bZIP transcription factor ABRE-BINDING FACTOR 2 (ABF2), a positive regulator of abscisic acid signaling**

Katrina J Linden<sup>1,2</sup>, Yi-Tze Chen<sup>1,3</sup>, Khin Kyaw<sup>1</sup>, Brandan Schultz<sup>1</sup>, Judy Callis<sup>1-3\*</sup>

<sup>1</sup>Department of Molecular and Cellular Biology, <sup>2</sup>Integrative Genetics and Genomics Graduate Program, and <sup>3</sup>Plant Biology Graduate Program, University of California, Davis, Davis CA 95616.

\* Correspondence:  
Judy Callis  
[jcallis@ucdavis.edu](mailto:jcallis@ucdavis.edu)

## ABSTRACT

1 Most members of bZIP transcription factor (TF) subgroup A play important roles as positive  
2 effectors in abscisic acid (ABA) signaling during germination and/or in vegetative stress  
3 responses. In multiple plant species, one member, ABA INSENSITIVE 5 (ABI5), is a major  
4 transcription factor that promotes seed maturation and blocks early seeding growth in response  
5 to ABA. Other members, referred to as either ABRE-Binding Factors (ABFs), ABRE-Binding  
6 proteins (AREBs), or D3 PROTEIN BINDING FACTORS (DPBFs), are implicated as major  
7 players in stress responses during vegetative growth. Studies on the proteolytic regulation of  
8 ABI5, ABF1, and ABF3 in *Arabidopsis thaliana* have shown that the proteins have moderate  
9 degradation rates and accumulate in the presence of the proteasome inhibitor MG132.  
10 Exogenous ABA slows their degradation and the ubiquitin E3 ligase called KEEP ON GOING  
11 (KEG) is important for their degradation. However, there are some reported differences in  
12 degradation among subgroup A members. The conserved C-terminal sequences (referred to as  
13 the C4 region) enhance degradation of ABI5 but stabilize ABF1 and ABF3. To better understand  
14 the proteolytic regulation of the ABI5/ABFs and determine whether there are differences between  
15 vegetative ABFs and ABI5, we studied the degradation of an additional family member, ABF2,  
16 and compared its *in vitro* degradation to that of ABI5. As previously seen for ABI5, ABF1, and  
17 ABF3, epitope-tagged constitutively expressed ABF2 degrades in seedlings treated with  
18 cycloheximide and is stabilized following treatment with the proteasome inhibitor MG132. Tagged  
19 ABF2 protein accumulates when seedlings are treated with ABA but its mRNA levels do not  
20 increase, suggesting that the protein is stabilized in the presence of ABA. ABF2 is also an *in vitro*  
21 ubiquitination substrate of the E3 ligase KEG and recombinant ABF2 is stable in *keg* lysates.  
22 ABF2 with a C4 deletion degrades more quickly *in vitro* than full-length ABF2, as previously  
23 observed for ABF1 and ABF3, suggesting that the conserved C4 region contributes to its stability.  
24 In contrast to ABF2 and consistent with previously published work, ABI5 with C terminal deletions  
25 including an analogous C4 deletion is stabilized *in vitro* compared to full length ABI5. *In vivo*  
26 expression of an ABF1 C4 deletion protein appears to have reduced activity compared to  
27 equivalent levels of full length ABF1. Additional group A family members show similar proteolytic  
28 regulation by MG132 and ABA. Altogether, these results together with other work on ABI5  
29 regulation suggest that the vegetative ABFs share proteolytic regulatory mechanisms that are not  
30 completely shared with ABI5.

31  
32

33 **KEYWORDS:** abscisic acid, ABF, bZIP, proteolysis, ubiquitin, KEG

34  
35

## INTRODUCTION

36

37  
38 The *Arabidopsis thaliana* family of basic leucine zipper (bZIP) transcription factors consists of 67-  
39 78 members (Jakoby et al. 2002, Deppmann et al. 2004, and Dröge-Laser et al. 2018). bZIP  
40 proteins are characterized by the presence of a DNA-binding basic region enriched in arginine or  
41 lysine residues and a leucine zipper dimerization motif that consists of a variable number of  
42 leucine heptad repeats. *Arabidopsis* bZIPs are divided into 13 groups (A-K, M, and S) defined by  
43 sequence similarity in the basic region and by shared conserved motifs outside of the bZIP domain  
44 (Dröge-Laser et al. 2018). Group A, with thirteen members, can be further divided into four  
45 subgroups (Dröge-Laser et al. 2018). Nine members in two subgroups share four additional  
46 regions called C(conserved)1-4 (Uno et al. 2000, Choi et al. 2000). The ABI5 subgroup consists  
47 of ABA INSENSITIVE 5 (ABI5, also referred to as Dc3 PROTEIN BINDING FACTOR or DPBF1)  
48 and three other DPBFs (DBPF2, DPBF3/AREB3 for ABA RESPONSIVE ELEMENT BINDING,

49 and DPBF4/EEL for ENHANCED EM LEVEL). The next closest subgroup, with a diverged C4  
50 region, is the ABF subgroup, consisting of ABF1, ABF2/AREB1, ABF3/DPBF5, ABF4/AREB2,  
51 and one member currently unnamed and uncharacterized (At5g42910) (Brocard et al. 2002,  
52 Dröge-Laser et al. 2018). With the exception of At5g42910, which has not been tested, the other  
53 eight members show binding to a synthetic multimer of an ABA-responsive element (Uno et al.  
54 2000; Choi et al. 2000, Kim and Thomas 2002). Multiple members of group A are broadly  
55 represented among land plants and are also present in the bryophytes *Physcomitrella patens* and  
56 *Marchantia polymorpha*. Two *ABF/ABI5* members are identified in the charophyte *Klesormidium*  
57 *nitens*, which lacks an ABA-dependent response but does have a desiccation tolerance response,  
58 suggesting the origins of land plant ABA-dependent responses utilize group A bZIP proteins as  
59 an early component (Hauser et al. 2011, Cuming 2019).

60 *ABI5*, the best characterized group A member, was first identified from a mutant screen in  
61 Arabidopsis for ABA-insensitive germination (Finkelstein 1994, Finkelstein and Lynch 2000) and  
62 has emerged as a key player in ABA responses during germination and early seedling growth.  
63 *ABI5* transcripts increase during seed development with highest levels in dry seeds but are also  
64 present in vegetative tissues at much lower levels (Finkelstein and Lynch 2000, Lopez-Molina  
65 and Chua 2000, Brocard et al. 2002). There is a short window of time after seed stratification  
66 when exogenous ABA can strongly induce *ABI5* mRNA and protein accumulation (Lopez-Molina  
67 et al. 2001), which presumably inhibits germination and growth since *abi5* loss-of-function (LOF)  
68 mutants germinate in normally inhibitory concentrations of ABA (Finkelstein 1994; Lopez-Molina  
69 and Chua, 2000). Although at levels ~100-fold less than in 2-day old seedlings, ABA can modestly  
70 increase *ABI5* mRNA in 10-day old plants (Brocard et al. 2002). *ABI5* does play roles during  
71 nitrate-mediated inhibition of lateral root growth (Signora et al. 2001) and in floral transition, the  
72 latter through positively modulating expression of *FLOWERING LOCUS C (FLC)* (Wang et al.  
73 2013), a flowering repressing transcription factor (Michaels and Amasino 1999).

74 Members of the *ABF* subgroup appear to have more significant roles during vegetative  
75 stress responses. Multiple *ABF* mRNAs increase in response to exogenous salt and ABA in  
76 mature plants (Uno et al. 2000, Choi et al. 2000). *ABF1* (Yoshida et al. 2015), *ABF2*, *ABF3*, and  
77 *ABF4* (Yoshida et al. 2010) all contribute to drought tolerance in mature plants. Over-expression  
78 of *ABF2* (Kim et al. 2004), *ABF3* or *ABF4* (Kang et al. 2002) slows germination, indicating that  
79 they can modulate this process as well.

80 In addition to regulation at the transcript level, *ABI5/ABF* abundance is regulated at the  
81 protein level (Liu and Stone 2014, Yu et al. 2015, Skubacz et al. 2016). Exogenous ABA slows  
82 the degradation of constitutively expressed *ABI5* and *ABF1* and *ABF3* in transgenic seedlings  
83 (Lopez-Molina et al. 2001, Chen et al. 2013), and the RING-type E3 ligase KEEP ON GOING  
84 (KEG) plays an important role in *ABI5*, *ABF1*, and *ABF3* degradation *in vivo* and ubiquitinates  
85 them *in vitro* (Stone et al. 2006, Chen et al. 2013). Additional ubiquitin ligases are implicated in  
86 promoting *ABI5* degradation. DWA1 (DWD HYPERSENSITIVE TO ABA 1) and DWA2 are two  
87 substrate specificity factors for a Cullin4-based ubiquitin E3 ligase (Lee et al. 2010) whose LOF  
88 mutants have ABA-hypersensitive phenotypes. Both interact *in vitro* with *ABI5* and *dwa* extracts  
89 degrade *ABI5* more slowly. ABA-HYPERSENSITIVE DCAF 1 (ABD1), another CUL4 substrate  
90 receptor, interacts with *ABI5* and plays a role in *ABI5* degradation (Seo et al. 2014). ABD1 and  
91 *ABI5* interact in a yeast two-hybrid assay, and endogenous *ABI5* pulled down with Myc-ABD1 in  
92 a co-IP from lysate of plants overexpressing Myc-ABD1. When seeds were treated with CHX  
93 following ABA treatment, *ABI5* protein degraded more slowly in *abd1-1* seeds than in wild-type  
94 seeds (Seo et al. 2014). With the exception of KEG, the role of these ligases in the proteolytic  
95 control of other group A bZIPs is not known.

96 The earliest described Arabidopsis *ABI5/ABF* post-translational modification is  
97 phosphorylation; using in-gel kinase assays, a 42-kDa kinase activity modifying peptide  
98 substrates corresponding to *ABF2* or *ABF4* C1, C2, or C3 regions is rapidly activated after *in vivo*  
99 ABA treatment (Uno et al. 2000, Furihata et al. 2006). Arabidopsis *ABF in vivo* phosphorylation

100 at two sites increased after treatment of leaves with ABA; one corresponds to an AREB3 C3  
101 serine, but the other phosphorylated C2-Ser cannot be assigned to a specific ABF because the  
102 tryptic peptide containing the site is 100% conserved among 7 ABF members (Kline et al. 2010).  
103 Interestingly, no net change in constitutively expressed Arabidopsis ABI5 phosphorylation is  
104 observed after ABA treatment of 8-day-old seedlings, although migration on SDS-PAGE is  
105 affected (Lopez-Molina et al. 2001, Lopez-Molina et al. 2002). Peptides that include the same C1-  
106 3 regions, but not C4, were identified as singly phosphorylated in HA-ABI5 by mass spectrometry  
107 from 4-week-old plants expressing ABI5 under the 35S promoter (Lopez-Molina et al. 2002).  
108 SnRK2 kinases at ~42-44 kDa were identified as ABA-inducible activities in a number of species  
109 (Johnson et al. 2002, Nakashima et al. 2009). At least two other kinases were observed in in-gel  
110 kinase assays (Johnson et al. 2002, Nakashima et al. 2009), leading to identification of calcium-  
111 dependent protein kinases (CDPKs), named CPKs in Arabidopsis. CPK32 interacts with ABFs 1-  
112 4 and phosphorylates an ABF4 peptide *in vitro* (Choi et al. 2005). CPK10 and 30 interact in yeast  
113 with ABF4 (Choi et al. 2005) and CPK4 and 11 phosphorylate full-length ABF1 and ABF4 in in-  
114 gel assays (Zhu et al. 2007). A caliculin-type kinase, CIPK26, interacts with ABI5 and  
115 phosphorylates it *in vitro* (Lyzenga et al. 2013). Recently, another CDPK, CPK6, was shown to  
116 interact with ABFs1-4 and ABI5 *in planta* and phosphorylation *in vitro* of ABI5 and ABF3 was  
117 demonstrated (Zhang et al. 2020). These studies have revealed a complex network of  
118 phosphorylations, with additional kinases likely awaiting discovery and characterization. A  
119 phospho-mimic form of AREB1/ABF2 with five Ser to Asp substitutions trans-activates ABRE-  
120 containing genes in an ABA-independent manner, suggesting that ABA-dependent  
121 phosphorylation activates the transcriptional activation function (Furihata et al. 2006).  
122 Recombinant ABFs, which are presumed to be unphosphorylated, bind to ABREs *in vitro* (Uno et  
123 al. 2000), in yeast one-hybrid assays (Choi et al. 2000) and are active in yeast (Kim et al. 2002),  
124 so the precise activating mechanism remains unclear. Current evidence suggests that  
125 phosphorylation status does not affect protein longevity: ABI5 with C1-4 serine/threonine residues  
126 substituted either for alanine or aspartate were equivalently degraded *in vitro* (Liu and Stone  
127 2014).

128 Other post-translational modifications of ABFs/ABI5 have been linked to protein longevity.  
129 ABI5 is S-nitrosylated in an NO-dependent manner, and this modification negatively affects ABI5  
130 accumulation (Albertos et al. 2015). The SUMO-modification pathway, another protein  
131 modification system, also modulates ABA responses. A reduction in sumoylation components  
132 increases ABA sensitivity in seed germination and root growth, and ABI5 mono-sumoylation *in*  
133 *vivo* is dependent on SIZ1, the major plant SUMO E3 ligase (Miura et al. 2009). The genetic  
134 relationship between *siz1* and *abi5* mutants suggest that SIZ1 suppresses ABA responses in an  
135 ABI5-dependent manner.

136 There are some differences and unknowns in the proteolytic regulation of ABFs. Of the  
137 seven group A members, only DPBF2 retains the cysteine required for S-nitrosylation, and  
138 whether ABFs are sumoylated is relatively uncharacterized. ABFs lack the SUMO consensus  
139 sequence found in ABI5 (using sumoplot) and some members lack a similarly located lysine  
140 SUMO attachment site identified in ABI5. However, ABF3 was positive in a global screen for  
141 SUMO targets enriched after heat stress, although the attachment site was not reported (Rytz et  
142 al. 2018). Another example of a difference in proteolytic regulation among group A proteins is the  
143 role of the C4 region. These sequences enhance degradation of ABI5 (Liu and Stone 2013) but  
144 slow ABF1 and ABF3 degradation in *in vitro* assays (Chen et al. 2013). ABA-dependent  
145 phosphorylation at a conserved serine/threonine in the C4 region has been proposed to play a  
146 role in stabilizing ABF3 by promoting ABF3 interaction with a 14-3-3 protein (Sirichandra et al.  
147 2010). This phosphorylation site is conserved in ABI5 and also plays a role in ABI5 interaction  
148 with 14-3-3 proteins. In barley, HvABI5 interacts with several 14-3-3 proteins, and introducing a  
149 phospho-null substitution at T350 in the C4 region in HvABI5 eliminated interaction with 14-3-3  
150 proteins in a yeast two-hybrid assay (Schoonheim et al. 2007). Arabidopsis ABI5 also interacts

151 with a 14-3-3 protein in a yeast two-hybrid assay (Jaspert et al. 2011). While the C4  
152 phosphorylation site appears to play similar roles in 14-3-3 binding for ABI5 and ABF3, sequence  
153 conservation between ABI5 and the ABFs is low in this region and could account for the different  
154 role of the C4 in regulating ABI5 compared to the other ABFs.

155 To better characterize ABF proteolytic regulation and to understand the proteolytic  
156 differences between ABF and ABI5 subgroups, we characterized the degradation of an additional  
157 ABF family member, ABF2. Like ABF1 and ABF3, ABF2 degrades in seedlings treated with  
158 cycloheximide, is stabilized following treatment with the proteasome inhibitor MG132, rapidly  
159 accumulates in seedlings treated with ABA, and is an *in vitro* KEG substrate. ABF2 with a C4  
160 deletion degrades more quickly than full-length ABF2 *in vitro*, while ABI5 degradation in the same  
161 assays is slowed by C-terminal deletions, showing that the C4 region of ABF2 contributes to its  
162 stability and confirming differences between ABI5 and ABFs. We also characterized the *in vivo*  
163 activity of a C4 deletion form of ABF1. Seeds from lines overexpressing full-length ABF1  
164 germinated more slowly than seeds from lines overexpressing ABF1 with a C4 deletion,  
165 suggesting that the C4 region is important for ABF1 activity. A survey of other ABF/ABI5 subgroup  
166 members suggests that their regulation by ABA and the proteasome is similar to that of previously  
167 characterized ABFs. Altogether, these results suggest that the members of the ABF share  
168 proteolytic regulatory mechanisms that are not completely shared with ABI5.

169  
170

## 171 MATERIALS AND METHODS

172

### 173 *Plant growth conditions, materials, and genotyping*

174 *A. thaliana* seeds were surface-sterilized in a solution of 25% bleach and 0.02% Triton-  
175 X100 for ten minutes, rinsed with sterile H<sub>2</sub>O, and stratified at 4°C for at least 24 hours before  
176 plating. For agar-grown seedlings, seeds were plated on solid growth media (GM) consisting of  
177 4.3 g/L Murashige and Skoog basal salt mixture (Sigma), 1% sucrose, 0.5 g/L MES, 1X B vitamins  
178 (0.5 µg/mL nicotinic acid, 1 µg/mL thiamine, 0.5 µg/mL pyridoxine, and 0.1 µg/mL myo-inositol,  
179 Sigma), and 8 g/L Bacto Agar (Becton Dickinson), pH 5.7. After two weeks at room temperature  
180 under constant light, seedlings were transplanted from agar GM plates to soil, and plants were  
181 grown at 20°C with 50% humidity and 16 hours light/8 hours dark. For liquid-grown seedlings,  
182 approximately 100 seeds were added to 1 mL liquid GM distributed around the periphery of a 60  
183 mm petri dish (Falcon #353002) and grown at room temperature under constant light.

184 *A. thaliana* ecotype Col-0 (CS70000) and *keg* insertion alleles were obtained from the  
185 Arabidopsis Biological Resource Center in Columbus, Ohio (<https://abrc.osu.edu/>). The *keg-1*  
186 (At5g13530) T-DNA line SALK\_049542 and the *keg-2* T-DNA line SALK\_018105 (previously  
187 characterized in Stone et al. 2006) were maintained as heterozygotes because homozygous  
188 individuals do not progress beyond the seedling stage. Homozygous *keg* seedlings were identified  
189 by their phenotypic differences from wild-type siblings (Stone et al. 2006). The *keg* genotype was  
190 verified by PCR using primers listed in Supplemental **Table 1**. For *keg-1* lines, primer 5-253 was  
191 used with primer 5-254 to produce a WT gene-specific product, and primer 5-254 was used with  
192 the T-DNA left border primer 9-001 for a T-DNA junction product. For *keg-2* lines, primer 9-113  
193 was used with primer 9-114 for a WT gene-specific product, and primer 9-114 was used with the  
194 T-DNA left border primer 9-001 for a T-DNA junction product.

195 To generate transgenic *A. thaliana* lines expressing epitope-tagged proteins, the plant  
196 expression constructs described below were transformed into *Agrobacterium tumefaciens* strain  
197 AGL1. The floral dip method (Clough and Bent 1998) was used to transform the expression  
198 construct into Col-0 plants. Transformants that segregated 3:1 on GM with 50 µg/mL kanamycin  
199 were propagated and homozygous T3 or T4 seedlings were used in experiments (except for  
200 Figures 2.1, 2.2 and Supplemental Figures 2-4, where T2 segregating seed was used).  
201 Transgenic line information is in Supplemental Table 4.

202  
203  
204  
205  
206  
207  
208  
209  
210  
211  
212  
213  
214  
215  
216  
217  
218  
219  
220  
221  
222  
223  
224  
225  
226  
227  
228  
229  
230  
231  
232  
233  
234  
235  
236  
237  
238  
239  
240  
241  
242  
243  
244  
245  
246  
247  
248  
249  
250  
251  
252

### *Cycloheximide, MG132, and ABA treatments*

Seedlings were grown in sterile liquid GM in 60 mm petri dishes and after six days the liquid GM was replaced to allow seedlings to adjust to fresh media overnight. The following day, for cycloheximide treatments the liquid GM was replaced with liquid GM containing 0.2 mg/mL cycloheximide (Sigma) or plain liquid GM as a mock control. For MG132 treatments, the liquid GM was replaced with liquid GM containing 50  $\mu$ M MG132 (Peptides International #IZL-3175-v, or Selleck Chemical #S2619-5MG) or 0.5% DMSO as a solvent control. For ABA treatments, the liquid GM was replaced with liquid GM containing 50  $\mu$ M ABA (Sigma) or 0.1% EtOH as a solvent control. After the indicated time, seedlings were flash frozen in liquid nitrogen and ground in fresh buffer (50 mM Tris pH 8.1, 250 mM NaCl, 0.5% NP-40, 1 mM PMSF, 50  $\mu$ M MG132, and 1 cOmplete Mini EDTA-free protease inhibitor tablet (Roche #11836170001) per 10 mL buffer). Lysate was collected after centrifugation at 13,000 rpm for 10 minutes at 4°C, and total protein concentration was measured using a Bradford assay (Protein Assay Dye Reagent Concentrate, Bio-Rad). Equal amounts of total protein per sample were separated by 10% SDS-PAGE, and 10xMyc-ABF2 protein was visualized with Anti-myc western blotting. Anti-actin western blotting or Ponceau S staining of the membrane (Supplemental Figures 2-4) was used to visualize actin for a loading control.

### *Cell-free degradation assays*

Cell-free degradation assays were performed based on those described in Wang et al. 2009. Approximately 100 7-day-old liquid grown seedlings (0.15g fresh weight) were flash frozen in liquid nitrogen and stored at -80°C until use. Each 0.15g tube of frozen seedlings was ground in 350  $\mu$ L fresh buffer (25 mM Tris, 10 mM ATP, 10 mM MgCl<sub>2</sub>, 10 mM NaCl, and 1 mM DTT). Lysate (approximately 2.5  $\mu$ g/ $\mu$ L total protein) was collected after centrifugation at 13,000 rpm for 10 minutes at 4°C. 300  $\mu$ L lysate was incubated at 22°C in a thermocycler and approximately 2  $\mu$ g of recombinant protein purified from *E. coli* was added to the lysate. For assays comparing degradation of multiple proteins, one lysate was divided into 300  $\mu$ L aliquots. For assays with MG132, 1.5  $\mu$ L of 10 mM MG132 in DMSO, or 1.5  $\mu$ L of DMSO as a solvent control, was added to the lysate prior to the addition of recombinant protein. Samples were removed at indicated time points, mixed with Laemmli sample buffer, and heated to 98°C for 7 minutes. Proteins were separated with 10% SDS-PAGE and anti-FLAG, anti-HA, anti-Myc, or anti-GST Western blotting was used to visualize the recombinant protein in each sample.

### *Germination experiments*

Age matched seeds were sterilized and plated on GM as described above, stratified for three days at 4°C, then incubated at 20°C in the light. At specific time points, the plates were scored for germination (radicle emergence) and returned to the growth chamber. Time courses for each line were repeated 3 times with ~50 seeds per experiment.

### *RNA extraction and quantitative PCR (qPCR)*

Seedlings were grown in liquid GM under constant light for 7 days and treated for six hours with 50  $\mu$ M ABA or 0.1% ethanol as a solvent control. Total RNA was isolated using the RNeasy Plant Mini Kit (Qiagen, 74904) according to manufacturer's instructions. 2  $\mu$ g of total RNA was used in each 10  $\mu$ L reverse transcription reaction performed with the SuperScript III First-Strand Synthesis System for RT PCR (Invitrogen, 18080-051) according to manufacturer's instructions. Real-time PCR amplification was performed with 20  $\mu$ L reactions containing 2  $\mu$ L of first-strand cDNA (diluted 1/10 with H<sub>2</sub>O), 10 pmoles of each primer, and 10  $\mu$ L PowerUp SYBR Green Master Mix (Applied Biosystems, A25742). Relative transcript levels were obtained using the comparative Ct method, normalized to *ACT2*. The experiment was performed independently 3 times with 3 technical replicates each time. Primer sequences are listed in **Supplemental Table 5**.

253  
254  
255  
256  
257  
258  
259  
260  
261  
262  
263  
264  
265  
266  
267  
268  
269  
270  
271  
272  
273  
274  
275  
276  
277  
278  
279  
280  
281  
282  
283  
284  
285  
286  
287  
288  
289  
290  
291  
292  
293  
294  
295  
296  
297  
298  
299  
300  
301  
302  
303

### Cloning and constructs

Primer sequences for plant expression cloning are listed in **Supplemental Table 2**. For the plant expression construct for 10xMyc-ABF2 under control of the 35S promoter (p9186), plasmid pVM491 (*ABF2* cDNA in pENTR223, stock # G85579) was obtained from the Arabidopsis Biological Resource Center (ABRC) in Columbus, Ohio (<https://abrc.osu.edu/>). A Gateway (Invitrogen) LR reaction was used to recombine the *ABF2* CDS into pGWB21 (pVM259) (Nakagawa et al. 2007) following manufacturer protocols. Similarly, cDNAs for *DPBF2* (G20103, pVM493) and *DPBF4* (G83893, pVM492) were obtained from the ABRC and recombined into pGWB21. For *ABF4* and *AREB3*, RNA was isolated from Arabidopsis seedlings and cDNAs were synthesized as described above, amplified with primers 9-363 and 9-364 (*ABF4*) or 9-365 and 9-366 (*AREB3*), cloned into pDONR201 with Gateway BP reactions, sequence verified, and recombined into pGWB21 with Gateway LR reactions. For expression of His<sub>6</sub>-HA<sub>3</sub>-ABF1 (p9204) and His<sub>6</sub>-HA<sub>3</sub>-ABF1-ΔC4 (p9205) under control of the *UBQ10* promoter, cDNAs synthesized as described above were amplified with primers 9-438 and 9-439 (*ABF1*) or 9-438 and 9-452 (*ABF1-ΔC4*). The PCR products were digested with *Asel* and *Bam*HI, then ligated into p3756, a modified pGreenII plasmid (Gilkerson et al. 2015), that had been cut with *Nde*I and *Bam*HI. The line expressing GFP under control of the *UBQ10* promoter (line 13240) was described in (Dreher 2006).

Primer sequences for bacterial expression cloning are listed in **Supplemental Table 3**. For the bacterial expression construct for full-length His<sub>6</sub>-FLAG-ABF2 (p9193), a Gateway LR reaction was used to recombine the *ABF2* cDNA from G85579 into the bacterial expression vector pEAK2 (Kraft 2007).

For the bacterial expression construct for full-length His<sub>6</sub>-HA<sub>3</sub>-ABF2 (p9213), p9208 (*ABF2* cDNA cloned into a modified pGreenII plasmid using primers 9-440 and 9-441) was digested with *Nde*I and *Bam*HI. The *ABF2* sequence was ligated into *Nde*I and *Bam*HI sites in the bacterial expression vector p3832, a modified pET3c (Novagen) plasmid containing a 5' His<sub>6</sub>-HA<sub>3</sub> cassette.

For the bacterial expression construct for His<sub>6</sub>-HA<sub>3</sub>-ABF2-ΔC4 (p6881), p9193 (*ABF2* cDNA in pEAK2, described above) was used as a template and primers 9-440 and 6-1072 were used to amplify the *ABF2* sequence, introduce a stop codon after base 1245 (relative to A of translation start ATG), and add *Nde*I and *Bam*HI restriction sites to the 5' and 3' ends, respectively. The sequence was ligated into *Nde*I and *Bam*HI sites in the bacterial expression vector p3832.

For the bacterial expression constructs for His<sub>6</sub>-HA<sub>3</sub>-ABI5 (p6943), -ABI5<sup>1-343</sup> (p6944), and -ABI5-ΔC4 (p6945), *ABI5* cDNA in pDONR (plasmid p9017, derived from the ABRC clone PYAt2g36270 described in Stone et al. 2006) was used as a template and primer 6-1107 was used with 6-1109 (*ABI5*), 6-1108 (*ABI5*<sup>1-343</sup>), or 6-1110 (*ABI5-ΔC4*) to amplify the *ABI5* sequence, introduce stop codons after base 1029 for *ABI5*<sup>1-343</sup> or base 1287 for -ΔC4, and add *Nde*I and *Bam*HI restriction sites to the 5' and 3' ends, respectively. The *ABI5*, *ABI5*<sup>1-343</sup>, and *ABI5-ΔC4* sequences were ligated into *Nde*I and *Bam*HI sites in the bacterial expression vector p3832.

The Myc-TGA1 (p9109) and Myc-GBF3 (p9107) constructs contain *TGA1* or *GBF3* cDNAs in p7296, a pEXP1-DEST expression vector (Thermo) modified with a Myc9 tag. RNA was isolated from Arabidopsis seedlings and cDNAs were synthesized as described above, amplified with primers 9-367 and 9-368 (*TGA1*) or 9-361 and 9-362 (*GBF3*), recombined into pDONR with Gateway BP reactions, then recombined with Gateway LR reactions into p7296. Sequences were verified. The GST-EGL3-FLAG construct (pVM567) contains *EGL3* in the pGEX-4T-1 vector. It was a gift from Ling Yuan at the University of Kentucky. The GST-FUS3 construct (pVM505) was obtained from Sonia Gazzarini as described in Chen et al. 2013. The GST-KEG-RKA construct was described in Stone et al. 2006. The UBC10 E2 construct was described in Kraft et al. 2005.

### Recombinant protein expression

304 *E. coli* transformed with expression constructs was grown in 10 mL cultures overnight at  
305 37°C, then added to flasks containing 500 mL LB (10 g/L tryptone, 5 g/L yeast extract, 5 g/L NaCl,  
306 15 g/L agar, pH 7.5). The 500 mL cultures were grown at 37°C for approximately 3 hours until the  
307 OD<sub>600</sub> was around 0.4-0.6, at which point the cultures were moved to room temperature and  
308 protein expression was induced with the addition of 0.5 mM isopropyl β-D-1-  
309 thiogalactopyranoside (IPTG) for three to four hours. Cells were collected by centrifugation and  
310 pellets were stored at -80°C. *E. coli* strains and induction compounds were as follows. His<sub>6</sub>-HA<sub>3</sub>-  
311 ABF2-ΔC4, His<sub>6</sub>-HA<sub>3</sub>-ABI5, -ABI5<sup>1-343</sup>, and -ABI5-ΔC4, Myc-GBF3, Myc-TGA1, and GST-EGL3-  
312 FLAG were expressed in BL21(DE3)pLysS cells and expression was induced with IPTG. His<sub>6</sub>-  
313 HA<sub>3</sub>-ABF2 and His<sub>6</sub>-FLAG-ABF2 were expressed in Lemo21(DE3) cells and induced with IPTG.  
314 GST-FUS3 was expressed as described in (Chen et al. 2013).  
315

#### 316 *Protein purification/enrichment*

317 Cell pellets were thawed on ice and resuspended in lysis buffer (25 mM Tris pH 7.5, 500  
318 mM NaCl, 0.01% Triton-X100, 30 mM imidazole, and 1 cOmplete Mini EDTA-free protease  
319 inhibitor tablet per 50 mL buffer). Cells were lysed by sonication and supernatant was reserved  
320 after centrifugation. His- or GST-tagged proteins were captured from the lysate by the addition of  
321 100 μL Ni Sepharose High Performance beads (GE Healthcare) or Glutathione Sepharose High  
322 Performance beads (GE Healthcare). Myc-tagged proteins were captured by addition of 75 μL  
323 EZview Red Anti-c-Myc Affinity Gel beads (Sigma). Beads were collected with centrifugation and  
324 rinsed at least 3 times with wash buffer (25 mM Tris pH 7.5, 300 mM NaCl, and 0.01% Triton-  
325 X100). Proteins were eluted from the beads by addition of 300 μL elution buffer (25 mM Tris, 150  
326 mM NaCl, 0.01% Triton-X100, and 300 mM imidazole for His-tagged proteins or 20 mM reduced  
327 glutathione for GST-tagged proteins) and shaking at 4°C for 30 minutes. Myc-tagged proteins  
328 were eluted with 100 ug/mL c-Myc peptide in 250 μL RIPA buffer. Supernatant was collected after  
329 centrifugation and mixed with glycerol for a final concentration of 20% glycerol, and frozen at -  
330 80°C.  
331

#### 332 *In vitro ubiquitination assays*

333 Substrate was incubated with E1, E2, E3, and ubiquitin in buffer (50 mM Tris-HCl pH 7.5,  
334 10 mM MgCl<sub>2</sub>, 1 mM ATP, 200 μM DTT, and 2.1 mg/mL phosphocreatine) for 2 hours at 30°C.  
335 Each 30 μL reaction included approximately 50 ng of yeast E1 (Boston Biochem), 250 ng of E2  
336 (AtUBC10), 5-10 μL of bead-bound E3 or 2-5 μL of soluble E3 (GST-KEG-RKA), 4 μg ubiquitin  
337 (Sigma), and 2 μL substrate (His<sub>6</sub>-HA<sub>3</sub>-ABF2). To stop the reaction, 10 μL of 5X LSB was added  
338 and samples were boiled for 10 minutes.  
339

#### 340 *SDS-PAGE and Western blotting*

341 Proteins were separated on 10% polyacrylamide gels and transferred onto PVDF-P  
342 membranes (Immobilon). Membranes were blocked in 5% nonfat powdered milk (Carnation)  
343 dissolved in TBS + 0.1% Tween 20 (Sigma). Proteins were detected with the following antibodies.  
344 FLAG-tagged proteins were detected with Monoclonal ANTI-FLAG M2-Peroxidase (Sigma  
345 #A8592) at a dilution of 1:5,000. HA-tagged proteins were detected with Anti-HA-Peroxidase  
346 (Roche #12013819001) at a dilution of 1:5,000. Myc-tagged proteins were detected with Anti-c-  
347 myc-Peroxidase (Roche #11814150001) at dilution of 1:5,000. GST-tagged proteins were  
348 detected with rabbit polyclonal GST (Z-5): sc-459 (Santa Cruz Biotechnology) at a dilution of  
349 1:5,000, followed by the secondary antibody peroxidase-conjugated AffiniPure Goat Anti-Rabbit  
350 IgG (H + L) (Jackson ImmunoResearch) at a dilution of 1:10,000. Actin was detected with  
351 Monoclonal Anti-Actin (plant) antibody produced in mouse (Sigma #A0480-200UL) at a dilution of  
352 1:5000, followed by peroxidase-labeled Antibody to Mouse IgG (H + L) produced in goat (KPL  
353 #074-1806) at a dilution of 1:10,000. SuperSignal West Pico Chemiluminescent Substrate  
354 (Thermo Scientific #34078) or ProSignal Dura (Promethues #20-301) were used as



355 chemiluminescent substrates. Chemiluminescence was captured on X-ray film (Phenix) or  
356 digitally imaged in the linear range of detection using the ImageQuant LAS400 imaging system  
357 (GE). For quantitation of *in vivo* degradation or accumulation, ABF values were normalized to  
358 actin and treatment values were divided by control values. Curve fitting, half-life determinations,  
359 and t-tests were performed using Prism (GraphPad) as described in each figure legend. In  
360 GraphPad, one-phase decay is the term for first order decay.

361

362

## 363 SUPPLEMENTAL MATERIALS

364

365 Supplemental Table 1 Primers for genotyping T-DNA lines

366 Supplemental Table 2 Primers for plant expression vector cloning

367 Supplemental Table 3 Primers for recombinant protein expression vector cloning

368 Supplemental Table 4 Transgenic line information

369 Supplemental Table 5 Primers for qPCR

370 Supplemental Figure 1 Additional replicas for CHX, MG132, and ABA experiments on ABF2 OE  
371 lines

372 Supplemental Figure 2. Additional constitutively expressed bZIP group A members accumulate  
373 in seedlings after incubation in MG132.

374 Supplemental Figure 3. Additional constitutively expressed bZIP group A proteins accumulate  
375 in seedlings after incubation in ABA.

376 Supplemental Figure 4. Constitutively expressed AREB3 bZIP group A protein accumulates in  
377 seedlings after incubation in ABA.

378 Supplemental Figure 5. Vector control for HA-ABF1 overexpression lines. Germination of seeds  
379 expressing GFP under control of the *UBQ10* promoter does not differ from germination of WT  
380 seeds.

381

382

## 383 RESULTS

384

### 385 *ABF2 degrades in seedlings and increases following MG132 treatment*

386 To examine the proteolytic regulation of ABF2 in plants, independent transgenic lines  
387 expressing Myc-ABF2 under control of the 35S promoter were generated. 7-day-old seedlings  
388 from three independent lines were treated with the protein synthesis inhibitor cycloheximide  
389 (CHX). Once translation is inhibited by CHX, no new ABF2 protein is synthesized in the seedlings  
390 and degradation of the existing ABF2 protein can be visualized by monitoring protein levels over  
391 time. In all three lines, Myc-ABF2 protein was reduced over time following CHX treatment,  
392 indicating that Myc-ABF2 is unstable *in vivo* (**Figure 1A and Supplemental Figure 1A-C**).  
393 Proteasomal substrates typically accumulate after proteasome activity is inhibited by the cell-  
394 permeable substrate analog MG132. Myc-ABF2 protein increased when intact seedlings were  
395 treated with MG132 (**Figure 1B and Supplemental Figure 1D**), indicating that Myc-ABF2  
396 degradation requires the proteasome.

397

### 398 *ABF2 increases in seedlings following ABA treatment*

399 Studies have shown that levels of constitutively expressed ABI5, ABF1, and ABF3 proteins  
400 increase in plants in response to exogenously supplied ABA (Lopez-Molina et al. 2001, Chen et  
401 al. 2013). To test whether ABF2 behaves similarly, seedlings from four independent transgenic  
402 lines expressing Myc-ABF2 under control of the 35S promoter were treated with ABA (in both the  
403 segregating T2 and homozygous T4 generations). Myc-ABF2 protein increased in all four lines  
404 following ABA treatment (**Figure 1C and Supplemental Figure 1E,F**). To support the hypothesis  
405 that this accumulation results from protein stabilization and not an increase in synthesis, the

406 mRNA levels of the *Myc-ABF2* transgene were measured after 6 hrs of ABA or after six hours of  
407 0.1% EtOH as a solvent control. While mRNA for the positive control *RD29A* (Yamaguchi-  
408 Shinozaki and Shinozaki 1993) increased more than 100-fold after ABA treatment, *Myc-ABF2*  
409 mRNAs did not increase as much as *Myc-ABF2* protein levels (Figure 1D).

410

411 *Survey of other group A bZIP proteins reveals regulation by MG132 and ABA.*

412 To investigate the proteolytic stability of other group A members, analogous epitope-  
413 tagged ABF4, DPBF2, DPBF4, and AREB3 proteins were expressed from the same vector  
414 system described above, and three independent transgenic lines overexpressing each protein  
415 were tested for effects of MG132 and ABA on protein accumulation (Supplemental figures 2, 3,  
416 and 4). ABF4, DPBF2, and DPBF4 accumulated in the presence of MG132 (AREB3 lines were  
417 not tested), and all four (ABF4, DPBF2, DPBF4, and AREB3) accumulated in the presence of  
418 ABA.

419

420 *ABF2 degrades rapidly in vitro and is stabilized by MG132*

421 To test whether ABF2 protein is unstable *in vitro*, we used a cell-free degradation assay  
422 (as described in Wang et al. 2009) in which recombinant ABF2 protein expressed in and purified  
423 from *E. coli* was added to a lysate from wild-type Arabidopsis seedlings. Samples were removed  
424 from the reaction at various timepoints, and Western blotting was used to visualize the amount of  
425 tagged ABF2 protein remaining at each timepoint. We tested ABF2 with two different epitope tags  
426 (HA and FLAG) to show that ABF2 protein degradation *in vitro* does not depend on the nature of  
427 the tag. Both His<sub>6</sub>-HA<sub>3</sub>-ABF2 and His<sub>6</sub>-FLAG-ABF2 degraded quickly in the cell-free degradation  
428 assay and were stabilized by the addition of MG132 (**Figure 2**). One-phase decay curves  
429 predicted similar half-lives of 2.3 minutes and 2.8 minutes for His<sub>6</sub>-HA<sub>3</sub>-ABF2 and His<sub>6</sub>-FLAG-  
430 ABF2, respectively (**Figure 2 C, D**).

431

432 *ABF2 is ubiquitinated by KEG in vitro, and KEG affects ABF2 degradation*

433 The E3 ligase KEG ubiquitinates ABI5, ABF1, and ABF3 *in vitro*, and promotes their  
434 degradation *in vivo* (Stone et al. 2006, Liu and Stone 2013, Chen et al. 2013). Degradation of  
435 recombinant ABF1 and ABF3 is slowed in *keg* lysates (Chen et al. 2013), and endogenous ABI5  
436 hyperaccumulates in *keg* seedlings (Stone et al. 2006). We used an *in vitro* ubiquitination assay  
437 to test whether ABF2 is also a potential *in vivo* KEG substrate. When recombinant His<sub>6</sub>-HA<sub>3</sub>-ABF2  
438 was incubated with a recombinant form of KEG and other proteins required for ubiquitination (E1,  
439 E2, and free ubiquitin), higher migrating forms of His<sub>6</sub>-HA<sub>3</sub>-ABF2 were observed only in the  
440 complete reaction (**Figure 3**), indicating covalent ubiquitin attachment to His<sub>6</sub>-HA<sub>3</sub>-ABF2.

441

442 To test whether KEG is important for ABF2 degradation, we used cell-free degradation  
443 assays to compare the degradation of bacterially expressed ABF2 protein in lysates from wild  
444 type seedlings to degradation in lysates from two different *keg* T-DNA alleles (*keg-1* and *keg-2*).  
445 *keg-1* contains a T-DNA insertion in the second exon and produces little or no *KEG* transcript,  
446 while *keg-2* contains a T-DNA insertion in the third intron and produces low levels of *KEG*  
447 transcript (Stone et al. 2006). Both lines exhibit similar seedling phenotypic differences from wild  
448 type (Stone et al. 2006). His<sub>6</sub>-HA<sub>3</sub>-ABF2 protein degraded in lysates from wild-type Col seedlings  
449 but was stable in lysates from both *keg-1* and *keg-2* seedlings (**Figures 4 and 5, respectively**)  
450 in parallel experiments with the same batch of recombinant protein. Less than 25% of His<sub>6</sub>-HA<sub>3</sub>-  
451 ABF2 protein remained after ten minutes in Col lysate, but there was no decrease in His<sub>6</sub>-HA<sub>3</sub>-  
452 ABF2 protein after ten minutes in either *keg* lysate.

452

453 For the cell-free degradation assays described above, Col lysates were prepared from 7-  
454 day-old seedlings. To obtain developmentally comparable *keg* lysates, *keg* seedlings were grown  
455 for two weeks before harvesting, but were still smaller and paler than Col seedlings and rarely  
456 had true leaves. To demonstrate that the observed stability of ABF2 in *keg* lysates is not a property  
of the delayed development of *keg* seedlings and to further explore the substrate specificity of

457 KEG, we tested whether *keg-1* lysates are capable of degrading other proteins. The cell-free  
458 degradation assay was used to compare the degradation of four additional transcription factors in  
459 both Col and *keg-1* lysates: the B3 transcription factor FUS3, the bHLH transcription  
460 factor ENHANCER OF GLABROUS 3 (EGL3), the bZIP transcription factor TGACG SEQUENCE-  
461 SPECIFIC BINDING PROTEIN 1 (TGA1, in bZIP group D) and the bZIP transcription factor G-  
462 BOX BINDING FACTOR 3 (GBF3, in bZIP group G) (**Figures 4-7**). FUS3 was selected because  
463 it is reported to be a proteasomal substrate that degrades rapidly in cell-free seedling degradation  
464 assays (Lu et al. 2010), and was previously used in our lab as a control for cell-free degradation  
465 assays with ABF1 and ABF3 (Chen et al. 2013). EGL3 is also reported to be a proteasomal  
466 substrate that degrades in seedling lysates (Patra et al. 2013). TGA1 and GBF3 were selected  
467 because they are bZIP transcription factors but are in different groups than the ABFs and affect  
468 different physiological processes, suggesting that their proteolytic regulation might be different  
469 (Dröge-Laser et al. 2018).

470 For all proteins with observed degradation, the data fit a pseudo-first order decay curve,  
471 as expected (graphs in C, **Figures 4-7**). TGA1 degraded at similar rates in Col and *keg-1* lysates  
472 (**Figure 6 A-C**). GBF3 and FUS3 also degraded in *keg-1* lysates, although their degradation was  
473 slower in *keg-1* lysates than in Col lysates (**Figures 4-5, D-F and 6 D-F, respectively**). Like ABF2,  
474 EGL3 was stabilized in *keg-1* lysates (**Figure 7**). Although the degradation of some proteins was  
475 slowed in *keg-1* lysates, these results show that protein degradation machinery is still functional  
476 in *keg-1* seedling lysates and that KEG is important for ABF2 degradation *in vitro*.

477  
478 *The C4 region affects ABF2 stability in vitro*

479 It was previously reported that a truncated ABI5 protein (ABI5<sup>1-343</sup>) lacking 99 C-terminal  
480 amino acids including the C4 region is more stable *in vitro* than full-length ABI5 (Liu and Stone  
481 2013). To confirm that our cell-free degradation assay setup could replicate this result and to  
482 directly compare truncated ABFs to comparably truncated ABI5 proteins, we cloned and  
483 recombinantly expressed ABI5<sup>1-343</sup> and ABI5- $\Delta$ C4, an ABI5 protein with a smaller deletion of just  
484 the C4 region (the 13 amino acids at the C-terminus). ABI5- $\Delta$ C4 is comparable to the ABF1 and  
485 ABF3 C4 deletions previously used in cell-free degradation assays (Chen et al. 2013). In cell-free  
486 degradation assays, His<sub>6</sub>-HA<sub>3</sub>-ABI5<sup>1-343</sup> degraded more slowly than full-length His<sub>6</sub>-HA<sub>3</sub>-ABI5, as  
487 previously reported by Liu and Stone 2013 (**Figure 8**). There was significantly more ABI5<sup>1-343</sup>  
488 protein than full-length ABI5 protein at the 2, 5, and 10 minute timepoints, and the predicted half-  
489 life of ABI5<sup>1-343</sup> at 2.6 minutes was twice as long as the predicted half-life of full-length ABI5 at 1.2  
490 minutes. His<sub>6</sub>-HA<sub>3</sub>-ABI5- $\Delta$ C4 also degraded more slowly than full-length His<sub>6</sub>-HA<sub>3</sub>-ABI5, but more  
491 quickly than His<sub>6</sub>-HA<sub>3</sub>-ABI5<sup>1-343</sup> (**Figure 8**). The predicted half-life of His<sub>6</sub>-HA<sub>3</sub>-ABI5- $\Delta$ C4 was  
492 intermediate at 1.8 minutes and there was significantly more ABI5- $\Delta$ C4 protein than full-length  
493 ABI5 protein at the 5 and 10 minute timepoints.

494 In contrast to ABI5, ABF1 and ABF3 proteins are less stable *in vitro* when their C4 regions  
495 are deleted (Chen et al. 2013) (see **Figure 9 A** for an alignment of the conserved regions in ABF  
496 proteins). To test whether ABF2 behaves similarly to ABI5 or ABF1 and ABF3, we cloned and  
497 recombinantly expressed a form of ABF2 lacking 12 amino acids at the C-terminus (ABF2- $\Delta$ C4).  
498 His<sub>6</sub>-HA<sub>3</sub>-ABF2- $\Delta$ C4 protein degraded more quickly than full length ABF2 in a cell-free  
499 degradation assay (**Figure 9**). The predicted half-life of full-length ABF2 at 3.8 minutes was longer  
500 than the predicted half-life of ABF2- $\Delta$ C4 at 2.1 minutes. Like ABF1 and ABF3, but in contrast to  
501 ABI5, ABF2 is stabilized by the C4 region.

502  
503 *Overexpression of full-length ABF1 or ABF1- $\Delta$ C4 causes delayed germination*

504 Because overexpression of untagged ABF2 or ABF3 in Arabidopsis leads to delayed  
505 germination (Kang et al. 2002, Kim et al. 2004), we used this assay to determine whether the C4  
506 region affects ABF function *in vivo*. We initially generated lines containing ABF2 FL and ABF2  
507 delta C4 expressing transgenes, but rapid silencing in these lines prevented analyses. We were

508 able to generate lines stably expressing versions of another ABF, ABF1, either full length (FL)  
509 His<sub>6</sub>-HA<sub>3</sub>-ABF1 or His<sub>6</sub>-HA<sub>3</sub>-ABF1-ΔC4 (**Figure 10A**) and evaluated the germination of  
510 independent homozygous transgenic lines over time compared to age-matched Col-0 control. We  
511 observed that seeds from all three FL ABF1 OE lines germinated more slowly than Col seeds on  
512 the same GM plates (**Figure 10 B**). After 32 hours, three lines overexpressing FL ABF1 reached  
513 23.7%, 21.7%, and 0.6% germination, while Col (WT, age matched seeds) controls grown on the  
514 same plates reached 82.3%, 98%, and 94.8% germination, respectively. As a transformation  
515 control, germination of a transgenic line expressing GFP under the same *UBQ10* promoter in the  
516 same plasmid backbone was analyzed and its germination did not differ from that of  
517 untransformed Col (Supplemental Figure 5).

518 To test whether the C4 region affects ABF1's ability to delay germination, we studied the  
519 germination of the ABF1-ΔC4 expressing lines. Germination of seeds from all three ABF1-ΔC4  
520 lines was also slower than germination of the control Col seeds (**Figure 10 C, light gray lines**  
521 **and symbols**), with 52.4%, 53%, and 39% germination at 32 hours, compared to 92.3%, 75.5%  
522 and 95.3% for the Col controls. These results show that overexpression of the ABF1-ΔC4 protein  
523 affects germination. To more directly assess *in vivo* activity, the ABF1 protein levels between lines  
524 were directly compared using the HA tag (**Figure 10 C**). There seems to be a correlation between  
525 ABF1 protein and germination timing, with the higher expressing ABF1 FL line (Line C) exhibiting  
526 slower germination compared to ABF1 FL lines A and B. Similarly, among the ABF1-ΔC4 lines,  
527 the line with two-fold more expression (Line C) germinated more slowly than two other ABF1-ΔC4  
528 lines (A and B). When comparing lines with equivalent expression of ABF1 FL vs ABF1-ΔC4, the  
529 ABF1-ΔC4 lines (Line A and Line B) germinated faster than the FL lines (Line A and Line B),  
530 suggesting that the ΔC4 version is less effective in slowing germination than the FL protein.

531  
532

## 533 DISCUSSION

534

535 ABF2 shares some aspects of proteolytic regulation with the other two previously analyzed  
536 ABF proteins in bZIP group A. These include instability both *in vitro* and in plants, accumulation  
537 regulated by the proteasome and ABA *in vivo*, *in vitro* ubiquitination by the E3 ligase KEG, KEG's  
538 importance for their cell-free degradation, and the stabilizing effect of the C4 region *in vitro*. While  
539 most of these properties are consistent with proteolytic regulation of group A member ABI5, there  
540 are differences between the ABF proteins and ABI5. The C4 region destabilizes ABI5 *in vitro* but  
541 stabilizes ABF1, ABF2, and ABF3. ABF1-ΔC4, ABF2-ΔC4, and ABF3-ΔC4 proteins degrade  
542 faster than full-length proteins, while ABI5-ΔC4 degrades more slowly in parallel experiments.

543 Phosphorylation at a conserved site in the ABF3 C4 region (T451) is hypothesized to  
544 contribute to ABF3 stability by promoting ABF3 interaction with a 14-3-3 protein (Sirichandra et  
545 al. 2010). Whether S413 phosphorylation is important for other ABFs interactions with a 14-3-3  
546 protein has not been published. The C-terminal amino acids of ABF1, 3, and 4 (LRRTLGPW)  
547 and ABF2 (LRRTESGPW) contain both mode I (Rxx[S/T]xP) and mode II (Rxxx[S/T]xP)  
548 consensus 14-3-3 binding sites, while ABI5 (LMRNPSCL), contains only a mode I site.  
549 However, in barley, HvABI5 interacts with several 14-3-3 proteins, and introducing a phospho-  
550 null substitution at T350 in HvABI5 eliminated interaction with 14-3-3 proteins in a yeast two-  
551 hybrid assay (Schoonheim et al. 2007), indicating that phosphorylation at the C4 site promotes  
552 14-3-3 interaction with ABI5 as described for ABF3. Arabidopsis ABI5 also interacted with a 14-  
553 3-3 protein in a yeast two-hybrid assay (Jaspert et al. 2011). Because the C4 phosphorylation site  
554 appears to play similar role in 14-3-3 binding to ABI5 and ABF3, there might be other factors in  
555 the C4 region that account for the different role of the C4 in regulating ABI5 protein compared to  
556 the other ABFs.

557 There are other aspects of ABI5 proteolytic regulation that are likely to differ. ABI5 stability  
558 is regulated by S-nitrosylation, with modification of C-153 conferring enhanced degradation in a

559 CUL4- and KEG-dependent manner (Albertos et al. 2015). ABF1-4 lack a corresponding cysteine  
560 residue at this position, suggesting that they are not regulated by NO in an analogous manner.  
561 Further studies are needed to dissect the differences and similarities between ABF1-4 and ABI5  
562 proteolytic regulation.

563 In the cell-free degradation assay, we explored the ability of *keg* extracts to degrade other  
564 types of transcription factors and tested extracts from two different *keg* LOF alleles. Both *keg-1*  
565 and *keg-2* lysates exhibited identical properties. TGA1 degraded similarly in *keg-1* and Col  
566 lysates, indicating that *keg* lysates are capable of degrading proteins. We also observed that  
567 degradation of several non-ABF proteins was slower in *keg-1* lysates than in Col lysates.  
568 Degradation of GBF3 and FUS3 was slowed, and EGL3 was stable in *keg-1* lysates compared to  
569 Col lysates over the ten-minute time course. The FUS3 results were unexpected, because  
570 previous assays in our lab observed that FUS3 degraded equivalently in *keg-1* lysates (Chen et  
571 al. 2013). However, the timepoints used in Chen et al. 2013 extended from 30 to 90 minutes, and  
572 most FUS3 protein had degraded in both Col and *keg-1* lysate by the first timepoint at 30 minutes.  
573 Slower degradation at early timepoints might not have been observed in those experiments. Our  
574 FUS3 cell-free degradation assay extended from 1 to 10 minutes, at which point just over 53% of  
575 FUS3 protein remained.

576 *keg-1* seedlings have a very high level of ABI5 protein (Stone et al. 2006). The slowed  
577 degradation of FUS3 and GBF3 in *keg-1* lysate might result from altered ABA signaling in *keg-1*,  
578 since both FUS3 and GBF3 are involved in ABA responses and FUS3 degradation is ABA-  
579 dependent. GFP-tagged FUS3 protein increases following ABA treatment (Gazzarrini et al. 2004,  
580 Lu et al. 2010), and ABA inhibits FUS3 degradation *in vitro* (Chiu et al. 2016). Although the bZIP  
581 protein GBF3 is not in bZIP group A, it is also known to play a role in ABA response. Plants  
582 overexpressing GBF3 are more drought resistant than wild-type plants and exhibit less inhibition  
583 of root growth by ABA (Ramegowda et al. 2017). EGL3 is involved in trichome development and  
584 anthocyanin synthesis and its degradation is mediated by the HECT E3 ligase UBIQUITIN  
585 PROTEIN LIGASE 3 (UPL3) (Patra et al. 2013). It is unclear why EGL3 is stabilized in *keg-1*  
586 lysate.

587 The reduced stability of additional proteins in *keg* extracts observed here is consistent with  
588 the pleiotropic phenotype of *keg* mutants (Stone et al. 2006) and the observation that simultaneous  
589 removal of ABI5 and several ABF proteins in the *keg* background has only a minor effect on the  
590 *keg* phenotype (Chen et al. 2013). Identification of CIPK26 (Lyzenaga et al. 2013), formate  
591 dehydrogenase (McNeilly et al. 2018), JAZ12 (Pauwels et al. 2015), and MKK4 and 5 (Gao et al.  
592 2020) as KEG interactors/substrates further support the model that KEG has broad effects on  
593 plant growth and stress responses. The roles of KEG in immunity and vascular development  
594 implicate KEG in plant defense responses, intracellular trafficking (Gu and Innes 2011, Gu and  
595 Innes 2012), and cellular differentiation (Gandotra et al. 2013), in addition to its role in the  
596 regulation of group A bZIP proteins. These additional processes as well as downstream ABA  
597 responses affected in *keg* could indirectly modulate the proteolysis of other transcription factors.

598  
599

600 **LITERATURE CITED**

- 601
- 602 **Albertos P, Romero-Puertas MC, Tatematsu K, Mateos I, Sánchez-Vicente I, Nambara E,**  
603 **and Lorenzo O.** (2015) S-nitrosylation triggers ABI5 degradation to promote seed germination  
604 and seedling growth. *Nature Communications* 6, 8669.
- 605
- 606 **Brocard IM, Lynch TJ, and Finkelstein RR.** (2002) Regulation and role of the Arabidopsis  
607 *Abscisic Acid-Insensitive 5* gene in abscisic acid, sugar, and stress response. *Plant Physiology*  
608 129, 1533-1543.
- 609
- 610 **Chen Y-T, Liu H, Stone S, and Callis J.** (2013) ABA and the ubiquitin E3 ligase KEEP ON  
611 GOING affect proteolysis of the *Arabidopsis thaliana* transcription factors ABF1 and ABF3. *Plant*  
612 *Journal* 75, 965–976.
- 613
- 614 **Chiu RS, Pan S, Zhao R, and Gazzarrini S.** (2016) ABA-dependent inhibition of the ubiquitin  
615 proteasome system during germination at high temperature in Arabidopsis. *Plant Journal* 88,  
616 749-761.
- 617
- 618 **Choi H, Hong J, Kang JY, and Kim SY.** (2000) ABFs, a family of ABA-responsive element  
619 binding factors. *Journal of Biological Chemistry* 275, 1723-1730.
- 620
- 621 **Choi HI, Park HJ, Park JH, Kim S, Im MY, Seo HH, Kim YW, Hwang I, and Kim SY.** (2005)  
622 Arabidopsis calcium-dependent protein kinase AtCPK32 interacts with ABF4, a transcriptional  
623 regulator of abscisic acid-responsive gene expression, and modulates its activity. *Plant*  
624 *Physiology* 139, 1750-1761.
- 625
- 626 **Clough SJ, and Bent AF.** (1998) Floral dip: a simplified method for *Agrobacterium*-mediated  
627 transformation of *Arabidopsis thaliana*. *Plant Journal* 16, 735-743.
- 628
- 629 **Cuming AC,** in *Advances in Botanical Research*, Seo M, Marion-Poll A, Eds. (Academic Press,  
630 2019), vol. 92, pp. 281-313.
- 631
- 632 **Deppmann CD, Acharya A, Rishi V, Wobbes B, Smeekens S, Taparowsky EJ, and Vinson**  
633 **C.** (2004) Dimerization specificity of all 67 B-ZIP motifs in *Arabidopsis thaliana*: a comparison to  
634 *Homo sapiens* B-ZIP motifs. *Nucleic Acids Research* 32, 3435-3445.
- 635
- 636 **Dreher KA.** (2006) An investigation of the proteolytic profile and biological function of members  
637 of the Aux/IAA family of proteins in *Arabidopsis thaliana*. *PhD Dissertation*, University of  
638 California, Davis.
- 639
- 640 **Dröge-Laser W, Snoek BL, Snel B, and Weiste C.** (2018) The Arabidopsis bZIP transcription  
641 factor family-an update. *Current Opinion in Plant Biology* 45, 36-49.
- 642
- 643 **Finkelstein RR.** (1994) Mutations at two new Arabidopsis ABA response loci are similar to the  
644 *abi3* mutations. *Plant Journal* 5, 765-771.

- 645  
646 **Finkelstein RR, and Lynch TJ.** (2000) The Arabidopsis abscisic acid response gene *ABI5*  
647 encodes a basic leucine zipper transcription factor. *Plant Cell* 12, 599-609.
- 648  
649 **Furihata T, Maruyama K, Fujita Y, Umezawa T, Yoshida R, Shinozaki K, and Yamaguchi-**  
650 **Shinozaki K.** (2006) Abscisic acid-dependent multisite phosphorylation regulates the activity of  
651 a transcription activator AREB1. *PNAS* 103, 1988-1993.
- 652  
653 **Gandotra N, Coughlan SJ, and Nelson T.** (2013) The Arabidopsis leaf provascular cell  
654 transcriptome is enriched in genes with roles in vein patterning. *Plant Journal* 74, 48-58.
- 655  
656 **Gao C, Sun P, Wang W, and Tang D.** (2020) Arabidopsis E3 ligase KEG associates with and  
657 ubiquitinates MKK4 and MKK5 to regulate plant immunity. *Journal of Integrative Plant Biology*  
658 DOI: 10.1111/jipb.13007.
- 659  
660 **Gazzarrini S, Tsuchiya Y, Lumba S, Okamoto M, and McCourt P.** (2004) The transcription  
661 factor FUSCA3 controls developmental timing in Arabidopsis through the hormones gibberellin  
662 and abscisic acid. *Developmental Cell* 7, 373-385.
- 663  
664 **Gilkerson J, Kelley D, Tam R, Estelle M, and Callis J.** (2015) Lysine residues are not  
665 required for proteasome-mediated proteolysis of the auxin/indole acetic acid protein IAA1. *Plant*  
666 *Physiology* 168, 708-720.
- 667  
668 **Gu Y, and Innes RW.** (2011) The KEEP ON GOING Protein of Arabidopsis Recruits the  
669 ENHANCED DISEASE RESISTANCE1 Protein to Trans-Golgi Network/Early Endosome  
670 Vesicles. *Plant Physiology* 155, 1827.
- 671  
672 **Gu Y, and Innes RW.** (2012) The KEEP ON GOING protein of Arabidopsis regulates  
673 intracellular protein trafficking and is degraded during fungal infection. *Plant Cell* 24, 4717-4730.
- 674  
675 **Hauser F, Waadt R, and Schroeder JI.** (2011) Evolution of abscisic acid synthesis and  
676 signaling mechanisms. *Current Biology* 21, R346-R355.
- 677  
678 **Jakoby M, Weisshaar B, Droge-Laser W, Vicente-Carbajosa J, Tiedemann J, Kroj T, and**  
679 **Parcy F.** (2002) bZIP transcription factors in Arabidopsis. *Trends in Plant Science* 7, 106-111.
- 680  
681 **Jaspert N, Throm C, and Oecking C.** (2011) Arabidopsis 14-3-3 proteins: fascinating and less  
682 fascinating aspects. *Frontiers in Plant Science* 2, 96.
- 683  
684 **Johnson RR, Wagner RL, Verhey SD, and Walker-Simmons MK.** (2002) The abscisic acid-  
685 responsive kinase PKABA1 interacts with a seed-specific abscisic acid response element-  
686 binding factor, TaABF, and phosphorylates TaABF peptide sequences. *Plant Physiology* 130,  
687 837-846.
- 688

- 689 **Kang J, Choi H, Im M, and Kim SY.** (2002) Arabidopsis basic leucine zipper proteins that  
690 mediate stress-responsive abscisic acid signaling. *Plant Cell* 14, 343-357.
- 691  
692 **Kim S, Kang JY, Cho DI, Park JH, and Kim SY.** (2004) ABF2, an ABRE-binding bZIP factor, is  
693 an essential component of glucose signaling and its overexpression affects multiple stress  
694 tolerance. *Plant Journal* 40, 75-87.
- 695  
696 **Kim SY, Ma J, Perret P, Li Z, and Thomas TL.** (2002) Arabidopsis ABI5 subfamily members  
697 have distinct DNA-binding and transcriptional activities. *Plant Physiology* 130, 688-697.
- 698  
699 **Kline K, Barrett-Wilt G, and Sussman M.** (2010) *In planta* changes in protein phosphorylation  
700 induced by the plant hormone abscisic acid. *PNAS* 107, 15986-15991.
- 701  
702 **Kraft E.** (2007) An investigation of the ubiquitin conjugating enzymes and RING E3 ligases in  
703 *Arabidopsis thaliana*. *PhD Dissertation*, University of California, Davis.
- 704  
705 **Kraft E, Stone SL, Ma L, Su N, Gao Y, Lau O-S, Deng X-W, and Callis J.** (2005) Genome  
706 analysis and functional characterization of the E2 and RING domain E3 ligase ubiquitination  
707 enzymes of *Arabidopsis thaliana*. *Plant Physiology* 139, 1597-1611.
- 708  
709 **Lee J, Yoon H-J, Terzaghi W, Martinez C, Dai M, Li M, Byun M-O, and Deng X-W.** (2010)  
710 DWA1 and DWA2, two Arabidopsis DWD protein components of CUL4-based E3 ligases, act  
711 together as negative regulators in ABA signal transduction. *Plant Cell* 22, 1716-1732.
- 712  
713 **Liu H, and Stone SL.** (2013) Cytoplasmic degradation of the Arabidopsis transcription factor  
714 ABSCISIC ACID INSENSITIVE 5 is mediated by the RING-type E3 ligase KEEP ON GOING.  
715 *Journal of Biological Chemistry* 288, 20267-20279.
- 716  
717 **Liu H, and Stone SL.** (2014) Regulation of ABI5 turnover by reversible post-translational  
718 modifications. *Plant Signaling & Behavior* 9, e27577.
- 719  
720 **Lopez-Molina L, and Chua NH.** (2000) A null mutation in a bZIP factor confers ABA-  
721 insensitivity in *Arabidopsis thaliana*. *Plant & Cell Physiology* 41, 541-547.
- 722  
723 **Lopez-Molina L, Mongrand S, and Chua NH.** (2001) A postgermination developmental arrest  
724 checkpoint is mediated by abscisic acid and requires the ABI5 transcription factor in  
725 *Arabidopsis*. *PNAS* 98, 4782-4787.
- 726  
727 **Lopez-Molina L, Mongrand S, McLachlin DT, Chait BT, and Chua NH.** (2002) ABI5 acts  
728 downstream of ABI3 to execute an ABA-dependent growth arrest during germination. *Plant*  
729 *Journal* 32, 317-328.
- 730  
731 **Lu QS, Paz JD, Pathmanathan A, Chiu RS, Tsai AYL, and Gazzarrini S.** (2010) The C-  
732 terminal domain of FUSCA3 negatively regulates mRNA and protein levels, and mediates



- 733 sensitivity to the hormones abscisic acid and gibberellic acid in Arabidopsis. *Plant Journal* 64,  
734 100-113.
- 735  
736 **Lyzena WJ, Liu H, Schofield A, Muise-Hennessey A, and Stone SL.** (2013) Arabidopsis  
737 CIPK26 interacts with KEG, components of the ABA signalling network and is degraded by the  
738 ubiquitin-proteasome system. *Journal of Experimental Botany* 64, 2779-2791.
- 739  
740 **McNeilly D, Schofield A, and Stone SL.** (2018) Degradation of the stress-responsive enzyme  
741 formate dehydrogenase by the RING-type E3 ligase Keep on Going and the ubiquitin 26S  
742 proteasome system. *Plant Molecular Biology* 96, 265-278.
- 743  
744 **Michaels SD, and Amasino RM.** (1999) *FLOWERING LOCUS C* encodes a novel MADS  
745 domain protein that acts as a repressor of flowering. *Plant Cell* 11, 949-956.
- 746  
747 **Miura K, Lee J, Jin JB, Yoo CY, Miura T, and Hasegawa PM.** (2009) Sumoylation of ABI5 by  
748 the Arabidopsis SUMO E3 ligase SIZ1 negatively regulates abscisic acid signaling. *PNAS* 106,  
749 5418-5423.
- 750  
751 **Nakagawa T, Suzuki T, Murata S, Nakamura S, Hino T, Maeo K, Tabata R, Kawai T, Tanaka**  
752 **K, Niwa Y, Watanabe Y, Nakamura K, Kimura T, and Ishiguro S.** (2007) Improved Gateway  
753 binary vectors: high-performance vectors for creation of fusion constructs in transgenic analysis  
754 of plants. *Bioscience, Biotechnology, and Biochemistry* 71, 2095-2100.
- 755  
756 **Nakashima K, Fujita Y, Kanamori N, Katagiri T, Umezawa T, Kidokoro S, Maruyama K,**  
757 **Yoshida T, Ishiyama K, Kobayashi M, Shinozaki K, and Yamaguchi-Shinozaki K.** (2009)  
758 Three Arabidopsis SnRK2 protein kinases, SRK2D/SnRK2.2, SRK2E/SnRK2.6/OST1 and  
759 SRK2I/SnRK2.3, involved in ABA signaling are essential for the control of seed development  
760 and dormancy. *Plant & Cell Physiology* 50, 1345-1363.
- 761  
762 **Patra B, Pattanaik S, and Yuan L.** (2013) Ubiquitin protein ligase 3 mediates the proteasomal  
763 degradation of GLABROUS 3 and ENHANCER OF GLABROUS 3, regulators of trichome  
764 development and flavonoid biosynthesis in Arabidopsis. *Plant Journal* 74, 435-447.
- 765  
766 **Pauwels L, Ritter A, Goossens J, Durand AN, Liu H, Gu Y, Geerinck J, Boter M, Vanden**  
767 **Bossche R, De Clercq R, Van Leene J, Gevaert K, De Jaeger G, Solano R, Stone S, Innes**  
768 **RW, Callis J, and Goossens A.** (2015) The RING E3 ligase KEEP ON GOING modulates  
769 JASMONATE ZIM-DOMAIN12 stability. *Plant Physiology* 169, 1405-1417.
- 770  
771 **Ramegowda V, Gill US, Sivalingam PN, Gupta A, Gupta C, Govind G, Nataraja KN, Pereira**  
772 **A, Udayakumar M, Mysore KS, and Senthil-Kumar M.** (2017) GBF3 transcription factor  
773 imparts drought tolerance in *Arabidopsis thaliana*. *Scientific Reports* 7, 9148.
- 774  
775 **Rytz TC, Miller MJ, McLoughlin F, Augustine RC, Marshall RS, Juan Y-t, Charng Y-y, Scalf**  
776 **M, Smith LM, and Vierstra RD.** (2018) SUMOylome profiling reveals a diverse array of nuclear  
777 targets modified by the SUMO ligase SIZ1 during heat stress. *Plant Cell* 30, 1077.

- 778  
779 **Schoonheim PJ, Sinnige MP, Casaretto JA, Veiga H, Bunney TD, Quatrano RS, and de**  
780 **Boer AH.** (2007) 14-3-3 adaptor proteins are intermediates in ABA signal transduction during  
781 barley seed germination. *Plant Journal* 49, 289-301.
- 782  
783 **Seo KI, Lee JH, Nezames CD, Zhong S, Song E, Byun MO, and Deng XW.** (2014) ABD1 is  
784 an Arabidopsis DCAF substrate receptor for CUL4-DDB1-based E3 ligases that acts as a  
785 negative regulator of abscisic acid signaling. *Plant Cell* 26, 695-711.
- 786  
787 **Signora L, De Smet I, Foyer CH, and Zhang H.** (2001) ABA plays a central role in mediating  
788 the regulatory effects of nitrate on root branching in Arabidopsis. *Plant J* 28, 655-662.
- 789  
790 **Sirichandra C, Davanture M, Turk BE, Zivy M, Valot B, Leung J, and Merlot S.** (2010) The  
791 Arabidopsis ABA-activated kinase OST1 phosphorylates the bZIP transcription factor ABF3 and  
792 creates a 14-3-3 binding site involved in its turnover. *PLOS One* 5, e13935.
- 793  
794 **Skubacz A, Daszkowska-Golec A, and Szarejko I.** (2016) The role and regulation of ABI5  
795 (ABA-Insensitive 5) in plant development, abiotic stress responses and phytohormone crosstalk.  
796 *Frontiers in Plant Science* 7, 1884.
- 797  
798 **Stone SL, Williams LA, Farmer LM, Vierstra RD, and Callis J.** (2006) KEEP ON GOING, a  
799 RING E3 ligase essential for Arabidopsis growth and development, is involved in abscisic acid  
800 signaling. *Plant Cell* 18, 3415-3428.
- 801  
802 **Uno Y, Furihata T, Abe H, Yoshida R, Shinozaki K, and Yamaguchi-Shinozaki K.** (2000)  
803 Arabidopsis basic leucine zipper transcription factors involved in an abscisic acid-dependent  
804 signal transduction pathway under drought and high-salinity conditions. *PNAS* 97, 11632-11637.
- 805  
806 **Wang F, Zhu DM, Huang X, Li S, Gong YN, Yao QF, Fu XD, Fan LM, and Deng XW.** (2009)  
807 Biochemical insights on degradation of Arabidopsis DELLA proteins gained from a cell-free  
808 assay system. *Plant Cell* 21, 2378-2390.
- 809  
810 **Wang Y, Li L, Ye T, Lu Y, Chen X, and Wu Y.** (2013) The inhibitory effect of ABA on floral  
811 transition is mediated by ABI5 in Arabidopsis. *Journal of Experimental Botany* 64, 675-684.
- 812  
813 **Yamaguchi-Shinozaki K, and Shinozaki K.** (1993) Characterization of the expression of a  
814 desiccation-responsive *rd29* gene of *Arabidopsis thaliana* and analysis of its promoter in  
815 transgenic plants. *Molecular and General Genetics* 236, 331-340.
- 816  
817 **Yoshida T, Fujita M, Sayama H, Kidohoro S, Maruyama K, Mizoi J, Shinozaki K, and**  
818 **Yamaguchi-Shinozaki K.** (2010) AREB1, AREB2, ABF3 are master transcription factors that  
819 cooperatively regulate ABRE-dependent ABA signaling involved in drought stress tolerance and  
820 require ABA for full activation. *Plant Journal* 61, 672-685.
- 821

- 822 **Yoshida T, Fujita Y, Maruyama K, Mogami J, Todaka D, Shinozaki K, and Yamaguchi-**  
823 **Shinozaki K.** (2015) Four Arabidopsis AREB/ABF transcription factors function predominantly  
824 in gene expression downstream of SnRK2 kinases in abscisic acid signalling in response to  
825 osmotic stress. *Plant Cell and Environment* 38, 35-49.
- 826  
827 **Yu F, Wu Y, and Xie Q.** (2015) Precise protein post-translational modifications modulate ABI5  
828 activity. *Trends in Plant Science* 20, 569-575.
- 829  
830 **Zhang H, Liu D, Yang B, Liu W-Z, Mu B, Song H, Chen B, Li Y, Ren D, Deng H, and Jiang**  
831 **Y-Q.** (2020) Arabidopsis CPK6 positively regulates ABA signaling and drought tolerance  
832 through phosphorylating ABA-responsive element-binding factors. *Journal of Experimental*  
833 *Botany* 71, 188-203.
- 834  
835 **Zhu S-Y, Yu X-C, Wang X-J, Rui Zhao R, Li Y, Fan R-C, Shang Y, Du S-Y, Wang X-F, Wu F-**  
836 **Q, Xu Y-H, Zhang X-Y, and Zhang D-P.** (2007) Two calcium-dependent protein kinases, CPK4  
837 and CPK11, regulate abscisic acid signal transduction in Arabidopsis. *Plant Cell* 19, 3019-3036.
- 838  
839

## FIGURE LEGENDS

### Figure 1. In seedlings, ABF2 protein decreases following cycloheximide treatment and increases following MG132 or ABA treatment

7-day-old liquid grown seedlings from independent lines expressing 10xMyc-ABF2 were treated with (A) 0.2 mg/mL CHX dissolved in GM or plain liquid GM as a solvent control for six hours, (B) 50  $\mu$ M MG132 in DMSO or 0.5% DMSO as a solvent control for six hours, or (C) with 50  $\mu$ M ABA in EtOH or 5% EtOH as a solvent control for six hours. Equal amounts of total protein per sample were loaded for SDS-PAGE and anti-Myc western blotting was used to visualize the 10xMyc-ABF2 protein in each sample (upper panels). For a loading control, anti-actin western blotting was performed on the same membranes (lower panels). To measure the change in ABF2 protein for each line, all bands were quantified in Image Studio Lite, ABF2 values were normalized to actin values, and treatment value was divided by control. The treatment/control ratio is reported below each pair of samples. D) Expression of *Myc-ABF2* and *RD29A* mRNAs in 7-day-old seedlings treated with ABA for six hours, relative to mRNAs in mock-treated seedlings. qPCR results are shown as mean  $\pm$  SD. N = three biological replicates with 3 technical replicates each. Data were normalized to *ACT2*. *RD29A* serves as a positive control for ABA treatment. Note: the seedlings used in A are from the homozygous T3 generation, the seedlings used in B and C are from the segregating T2 generation, and the seedlings used in D are from the homozygous T4 generation.

### Figure 2. ABF2 degrades *in vitro* and is stabilized by MG132

In a cell-free degradation assay, recombinant full-length (A-C) His<sub>6</sub>-HA<sub>3</sub>-ABF2 or (D) His<sub>6</sub>-FLAG-ABF2-FL was added to lysate from Col seedlings and the reaction was split into separate tubes with equal volumes of either (A) DMSO or (B) 200  $\mu$ M MG132 dissolved in DMSO and incubated at 22°C. Samples were removed at the indicated times, mixed with Laemmli sample buffer, and heated to 98°C to stop the reaction. Three independent experiments were performed. (A, B) SDS-PAGE followed by anti-HA or anti-FLAG western blotting was used to visualize the ABF2 protein in each sample (upper panels). Ponceau staining was used to demonstrate equal loading (lower panels). Ponceaus for Experiment #1 are shown. (C) Western blots were quantified with Image Studio Lite and the fraction of protein remaining at each timepoint was graphed. For each reaction, GraphPad Prism nonlinear regression was used to fit a curve modeling one-phase decay of ABF2. R squared is 0.93. Bars are SE. N = 3 independent experiments. (D) Graph of identical time course with recombinant His<sub>6</sub>-FLAG-ABF2-FL (western blots not shown). R squared is 0.91. Bars are SE. N = 3 independent experiments.

### Figure 3. KEG-RKA ubiquitinates ABF2 *in vitro*

In an *in vitro* ubiquitination assay, recombinant His<sub>6</sub>-HA<sub>3</sub>-ABF2 was incubated with E1 (yeast recombinant), E2 (recombinant AtUBC10), the E3 GST-KEG-RK, and ubiquitin (Ub). After 1 hour, reactions were separated by SDS-PAGE. (A) His<sub>6</sub>-HA<sub>3</sub>-ABF2 was visualized with anti-HA western blotting. Components in the reaction are indicated with a +. (B) GST-KEG-RKA was visualized with anti-GST western blotting. Brackets indicate slower migrating forms of HA-ABF2 present only in the complete reaction, indicating ubiquitination.

### Figure 4. ABF2 protein is stabilized in *keg-1* lysate *in vitro*

In a cell-free degradation assay, recombinant His<sub>6</sub>-HA<sub>3</sub>-ABF2 or GST-FUS3 protein was added to lysate from Col or *keg-1* seedlings and the reaction was incubated at 22°C. Aliquots were removed at the indicated times, mixed with Laemmli sample buffer, and heated to 98°C to stop the reaction. (A, D) SDS-PAGE followed by anti-HA or anti-GST western blotting was used to visualize the His<sub>6</sub>-HA<sub>3</sub>-ABF2 or GST-FUS3 protein in each sample, respectively. Ponceau staining (below) was used to demonstrate equal loading. (B, E) Western blots were quantified with Image Studio Lite. Protein at time zero was normalized to 1 and the fraction of protein remaining at each

timepoint was graphed. Asterisk (\*) indicates the value differs significantly ( $p < 0.05$ ) from timepoint zero based on Anova (GraphPad Prism). **(C, F)** For each reaction, GraphPad Prism nonlinear regression was used to fit a curve modeling one-phase decay of His<sub>6</sub>-HA<sub>3</sub>-ABF2 or GST-FUS3. The *keg-1* line in **(C)** is not a one-phase decay curve because the data did not fit a decay curve. Bars are SE. N = 3 independent experiments (A and D show one representative experiment).

#### **Figure 5. ABF2 protein is stabilized in *keg-2* lysate *in vitro***

In a cell-free degradation assay, recombinant His<sub>6</sub>-HA<sub>3</sub>-ABF2 or GST-FUS3 protein was added to lysate from Col or *keg-2* seedlings and the reaction was incubated at 22°C. Aliquots were removed at the indicated times, mixed with Laemmli sample buffer, and heated to 98°C to stop the reaction. **(A, D)** SDS-PAGE followed by anti-HA or anti-GST western blotting was used to visualize the His<sub>6</sub>-HA<sub>3</sub>-ABF2 or GST-FUS3 protein in each sample, respectively. Ponceau staining was used to demonstrate equal loading. **(B, E)** Western blots were quantified with Image Studio Lite. Protein at time zero was normalized to 1 and the fraction of protein remaining at each timepoint was graphed. Asterisk (\*) indicates the value differs significantly ( $p < 0.05$ ) from timepoint zero based on Anova. **(C, F)** For each reaction, GraphPad Prism nonlinear regression was used to fit a curve modeling one-phase decay of His<sub>6</sub>-HA<sub>3</sub>-ABF2 or GST-FUS3. Bars are SE. N = 3 independent experiments (A and D show one representative experiment).

#### **Figure 6. The bZIP proteins TGA1 and GBF3 degrade in *keg-1* lysate *in vitro***

In a cell-free degradation assay, recombinant Myc-TGA1 or Myc-GBF3 protein was added to lysate from Col or *keg-1* seedlings and the reaction was incubated at 22°C. Aliquots were removed at the indicated times, mixed with Laemmli sample buffer, and heated to 98°C to stop the reaction. **(A, D)** SDS-PAGE followed by anti-Myc western blotting was used to visualize the Myc-TGA1 or Myc-GBF3 protein in each sample. Ponceau staining was used to demonstrate equal loading. **(B, E)** Western blots were quantified with Image Studio Lite. Protein at time zero was normalized to 1 and the fraction of protein remaining at each timepoint was graphed. Asterisk (\*) indicates the value differs significantly ( $p < 0.05$ ) from timepoint zero based on Anova. **(C, F)** For each reaction, GraphPad Prism nonlinear regression was used to fit a curve modeling one-phase decay of Myc-TGA1 or Myc-GBF3. Bars are SE. N = 3 independent experiments (A and D show one representative experiment).

#### **Figure 7. The bHLH protein EGL3 does not degrade significantly in *keg-1* lysate *in vitro***

In a cell-free degradation assay, recombinant FLAG-EGL3 protein was added to lysate from Col or *keg-1* seedlings and the reaction was incubated at 22°C. Aliquots were removed at the indicated times, mixed with Laemmli sample buffer, and heated to 98°C to stop the reaction. **(A)** SDS-PAGE followed by anti-FLAG western blotting was used to visualize the FLAG-EGL3 protein. Ponceau staining was used to demonstrate equal loading. **(B)** Western blots were quantified with Image Studio Lite. Protein at time zero was normalized to 1 and the fraction of protein remaining at each timepoint was graphed. Asterisk (\*) indicates the value differs significantly ( $p < 0.05$ ) from timepoint zero based on Anova. **(C)** For each reaction, GraphPad Prism nonlinear regression was used to fit a curve modeling one-phase decay of FLAG-EGL3. Bars are SE. N = 3 independent experiments (A shows one representative experiment).

#### **Figure 8. ABI5<sup>1-343</sup> and ABI5-ΔC4 degrade more slowly than full-length ABI5 *in vitro***

In a cell-free degradation assay, recombinant His<sub>6</sub>-HA<sub>3</sub>-ABI5, -ABI5-ΔC4, or -ABI5<sup>1-343</sup> protein was added to lysate from Col seedlings and the reactions were incubated at 22°C. Aliquots were removed at the indicated times, mixed with Laemmli sample buffer, and heated to 98°C to stop the reaction. **(A)** SDS-PAGE followed by anti-HA western blotting was used to visualize the HA-tagged protein in each sample. Ponceau staining (lower panels) was used to demonstrate equal loading. **(B)** Western blots were quantified with Image Studio Lite. Protein at time zero was normalized to 1 and the fraction of protein remaining at each timepoint was graphed. Asterisk (\*)

indicates significant difference ( $p < 0.05$ ) from fraction of full-length ABI5 protein remaining at the same timepoint based on Student's t-test. Significance not tested for 20 and 30 minute timepoints. **(C)** For each reaction, GraphPad Prism nonlinear regression was used to fit curves modeling one-phase decay of each protein.  $R^2$  values for His<sub>6</sub>-HA<sub>3</sub>-ABI5, -ABI5- $\Delta$ C4, and -ABI5<sup>1-343</sup> are 0.99, 0.98, and 0.86, respectively. Bars are SE. N = 3 independent experiments.

### **Figure 9. ABF2 lacking the C4 region degrades faster than full-length ABF2 *in vitro***

**(A)** Alignment of the conserved regions of ABF proteins. Phosphorylation sites are in bold. In a cell-free degradation assay, recombinant His<sub>6</sub>-HA<sub>3</sub>-ABF2 **(B)** or His<sub>6</sub>-HA<sub>3</sub>-ABF2- $\Delta$ C4 **(C)** was added to lysate from Col seedlings and the reaction was incubated at 22°C. Aliquots were removed at the indicated times, mixed with Laemmli sample buffer, and heated to 98°C to stop the reaction. Three independent experiments were performed. **(B, C)** SDS-PAGE followed by anti-HA western blotting was used to visualize the HA-tagged protein in each sample. Ponceau staining was used to demonstrate equal loading (Ponceau for Experiment #1 is shown). **(D)** Western blots were quantified with Image Studio Lite. Protein at time zero was normalized to 1 and the fraction of protein remaining at each timepoint was graphed. GraphPad Prism nonlinear regression was used to fit a curve modeling one-phase decay of each protein. Bars are SE. N = 3 independent experiments. **(E)** To compare slopes, a linear regression fit was performed in GraphPad Prism. Lines have significantly different slopes ( $p < 0.01$ ).

### **Figure 10. Overexpression of full-length ABF1 or ABF1- $\Delta$ C4 delays germination**

**(A)** Diagram of full-length ABF1 (upper) and ABF1- $\Delta$ C4 (lower) proteins. **(B)** Seeds from plants overexpressing full-length ABF1 or ABF1- $\Delta$ C4 (or Col as a WT control on the same plate) were plated on GM, stratified at 4°C for 3 days, then incubated at 20°C under constant light. After plates were moved to 20°C, germination was scored hourly from 24 to 32 hours. Lines with similar protein expression levels are marked with an (\*) (see panel C). N= at least 7 independent experiments, with 50 seeds per genotype per experiment. Bars are SE. **(C)** Comparison of HA-ABF1 protein level in each line. HA-tagged proteins were visualized with anti-HA western blotting (upper panel), and anti-actin western blotting (middle panel) was used as a loading control. Ponceau staining (lower panel) is an additional loading control. The same membrane was used for the anti-HA blot, anti-actin blot, and Ponceau stain. HA bands were normalized to actin bands, then compared to the lowest expressing full length line (ABF1 line A). ND = not determined (band not in linear range).

## **ACKNOWLEDGEMENTS**

This work was supported by a grant from the National Science Foundation (IOS-1557760 to J. Callis, PI) and funds from the Paul K. and Ruth R. Stumpf Endowed Professorship in Plant Biochemistry and Aggie Alumni Foundation Award to J.C. We thank Eli Nambara and Ruth Finkelstein for the gift of *abi5-7* seeds and Dr. Finkelstein for assistance with genotyping the *abi5-7* allele and helpful discussions. We thank Sonia Gazarrini for the gift of the GST-FUS3 construct, Ling Yuan at the University of Kentucky for the *EGL3* in the pGEX-4T-1 vector, Sara Hotton for the synthesis of the modified pEXP1-DEST Myc9 expression vector (p7296), and Jonathan Gilkerson for synthesis of the modified pET3c expression plasmid (p3832). We thank the University of California-Davis Controlled Environment Facility (CEF) for assistance with the propagation of transgenic plants. We thank many past members of the Callis laboratory for helpful discussions, most recently John Riggs. We thank Jemina Cornejo, Eduards Norkvests, Anna Chen, and Stephanie Ng for assistance in propagation and analyses of transgenic lines.

## **CONFLICT OF INTEREST STATEMENT**

The authors have no conflict of interest to declare.

### **AUTHOR CONTRIBUTIONS**

KL, Y-TC, and JC designed the research; KL, Y-TC, KK, and BS performed research; KL, Y-TC, JC, and BS analyzed data; KL and JC wrote the paper.

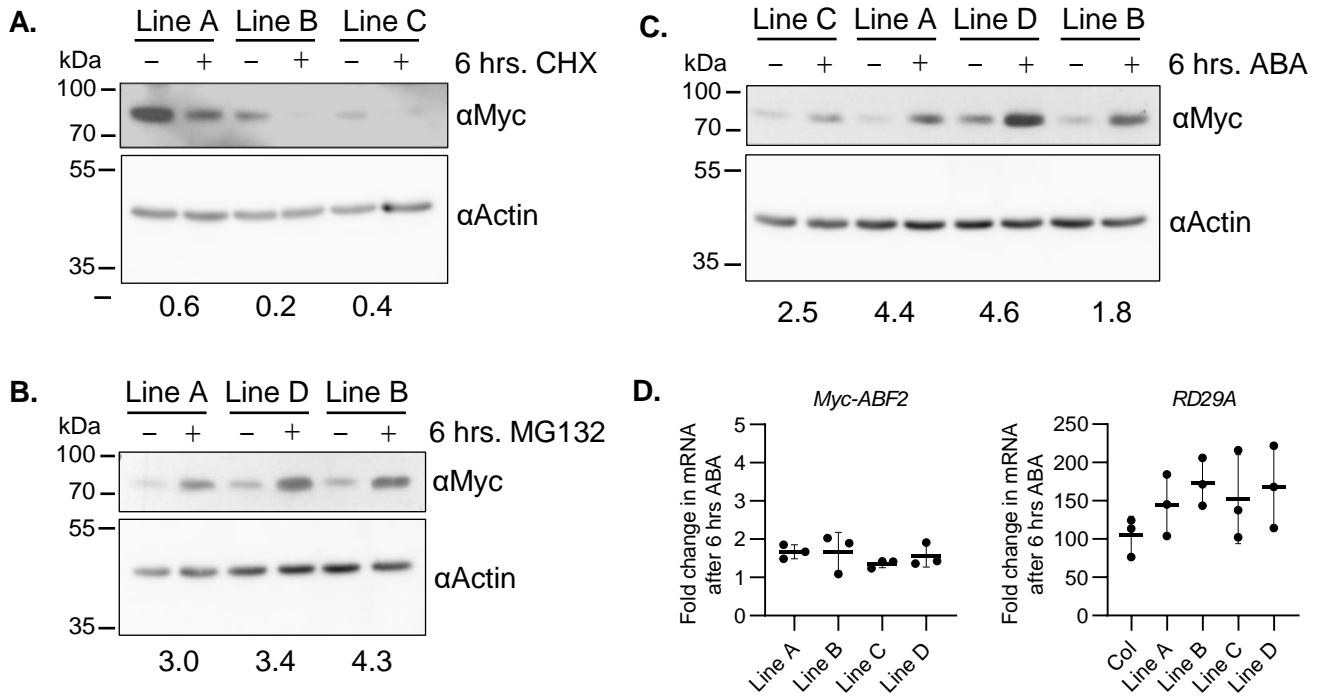

**Figure 1. In seedlings, ABF2 protein decreases following cycloheximide treatment and increases following MG132 or ABA treatment**



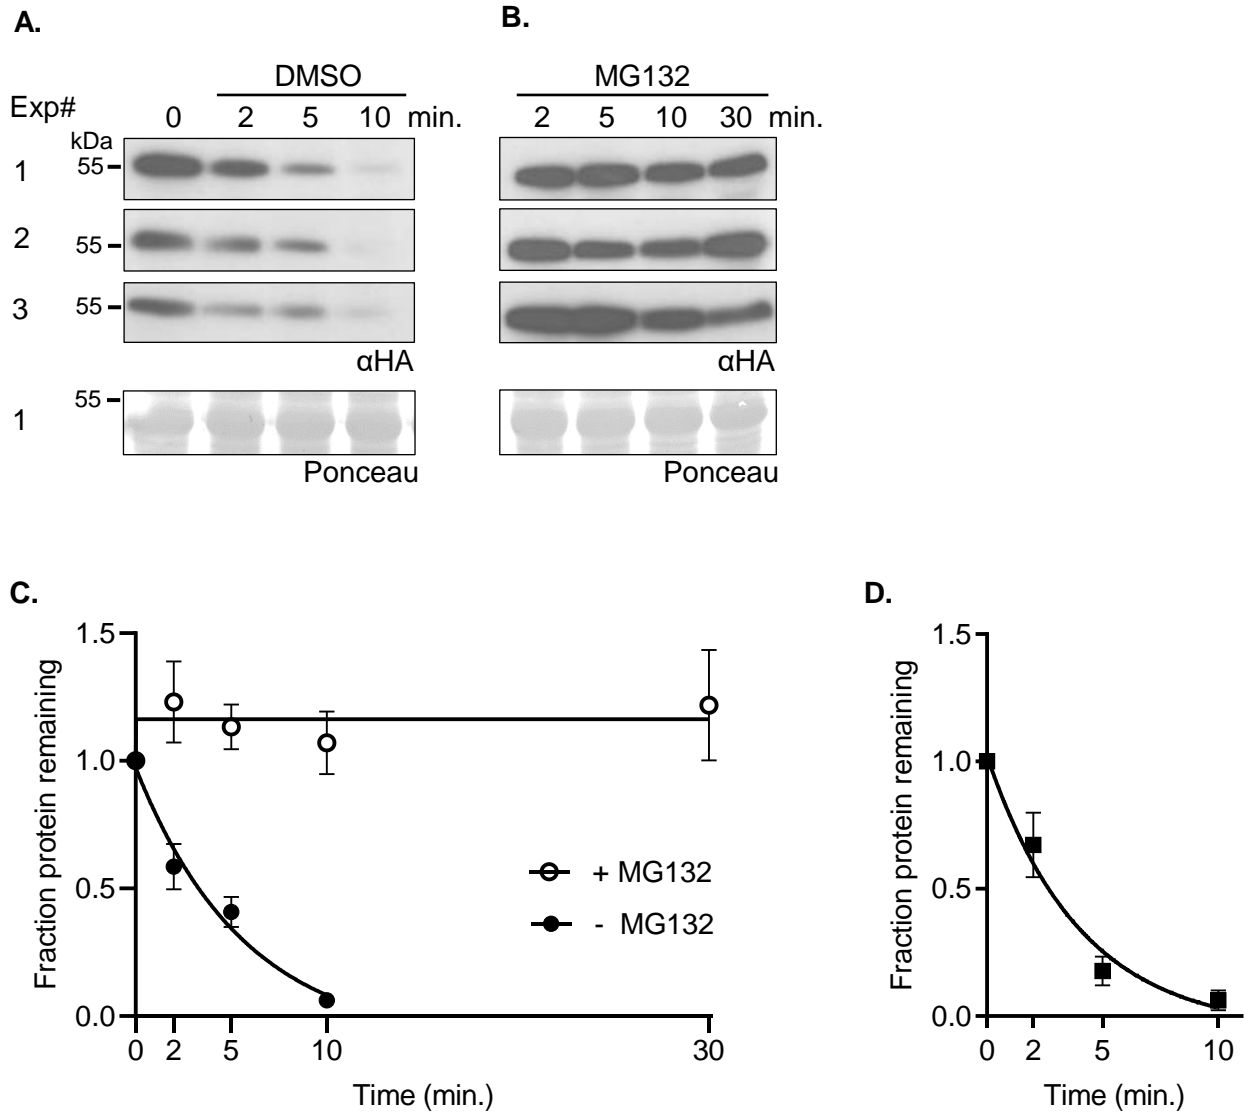

**Figure 2. ABF2 degrades *in vitro* and is stabilized by MG132**

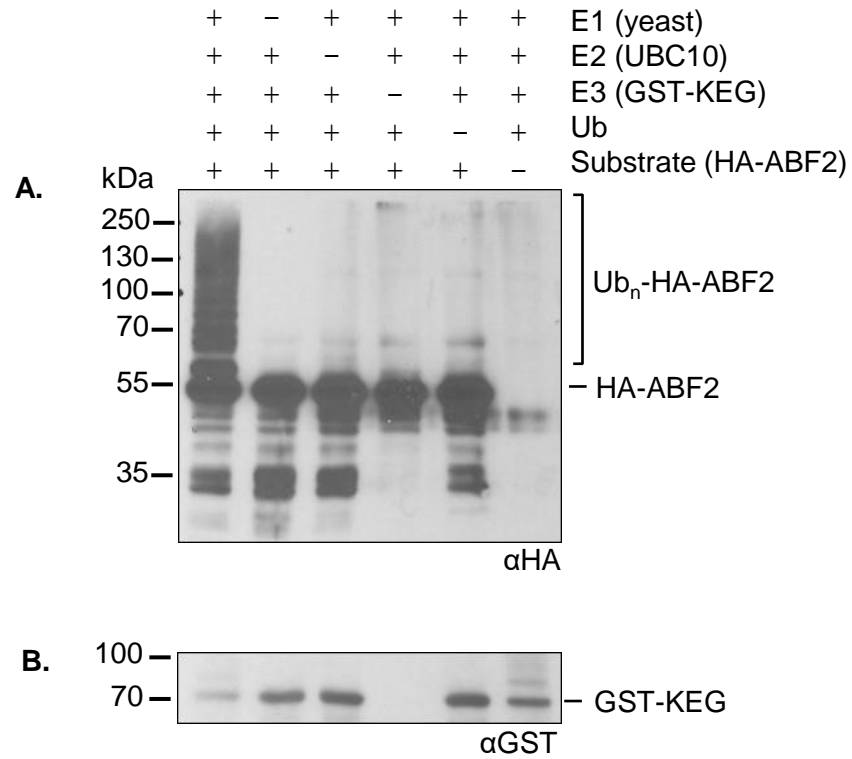

**Figure 3. KEG-RKA ubiquitinates ABF2 *in vitro***

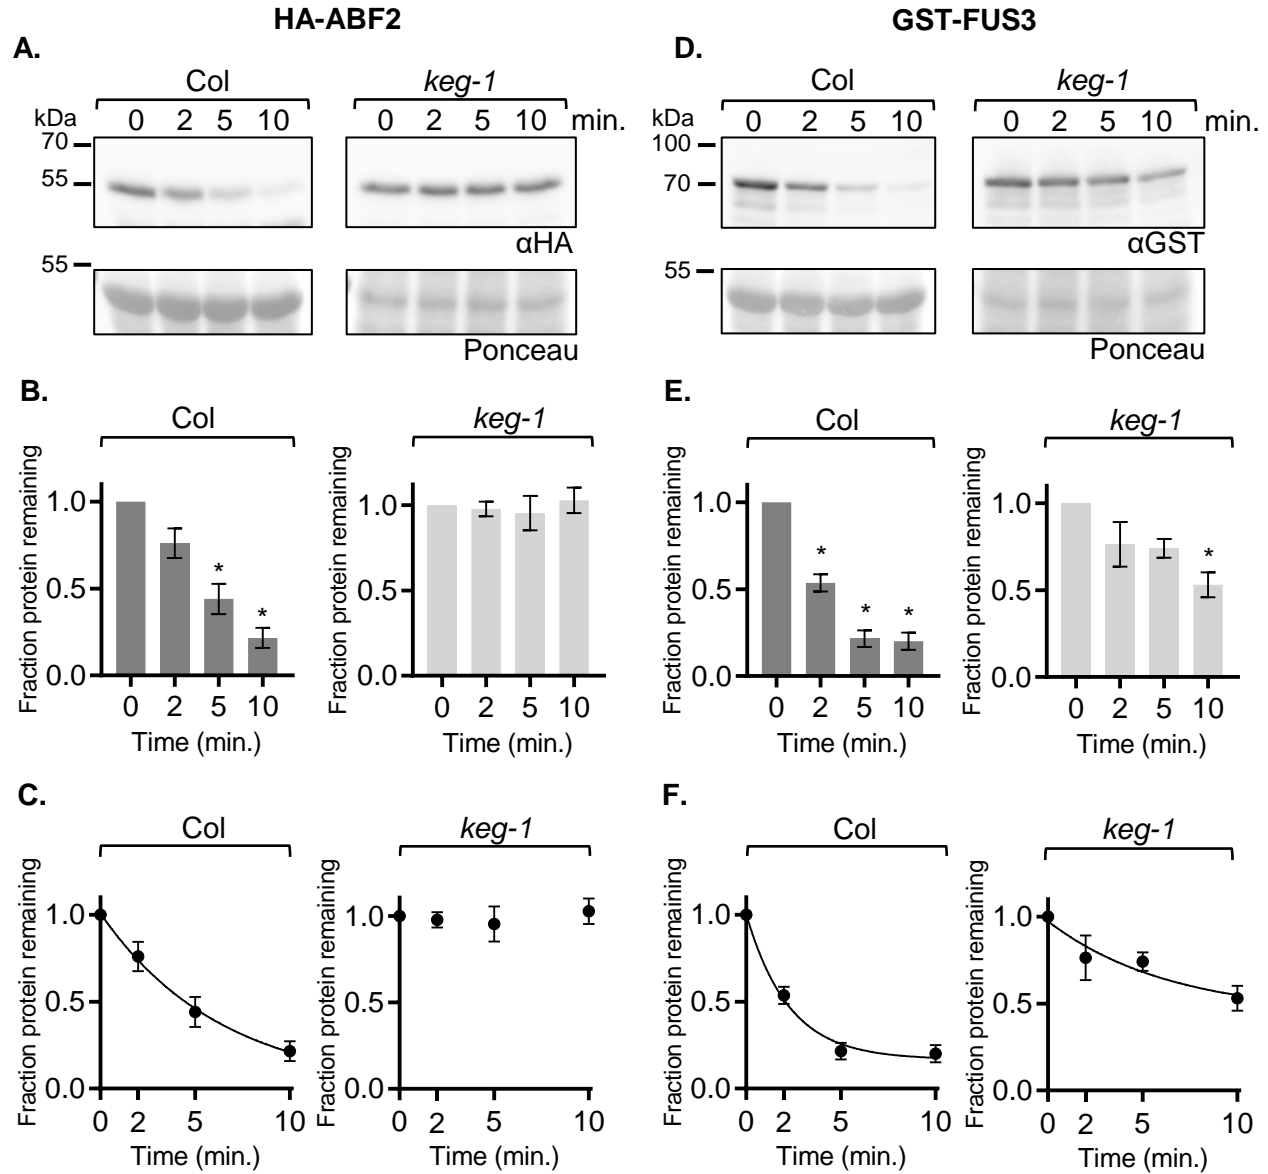

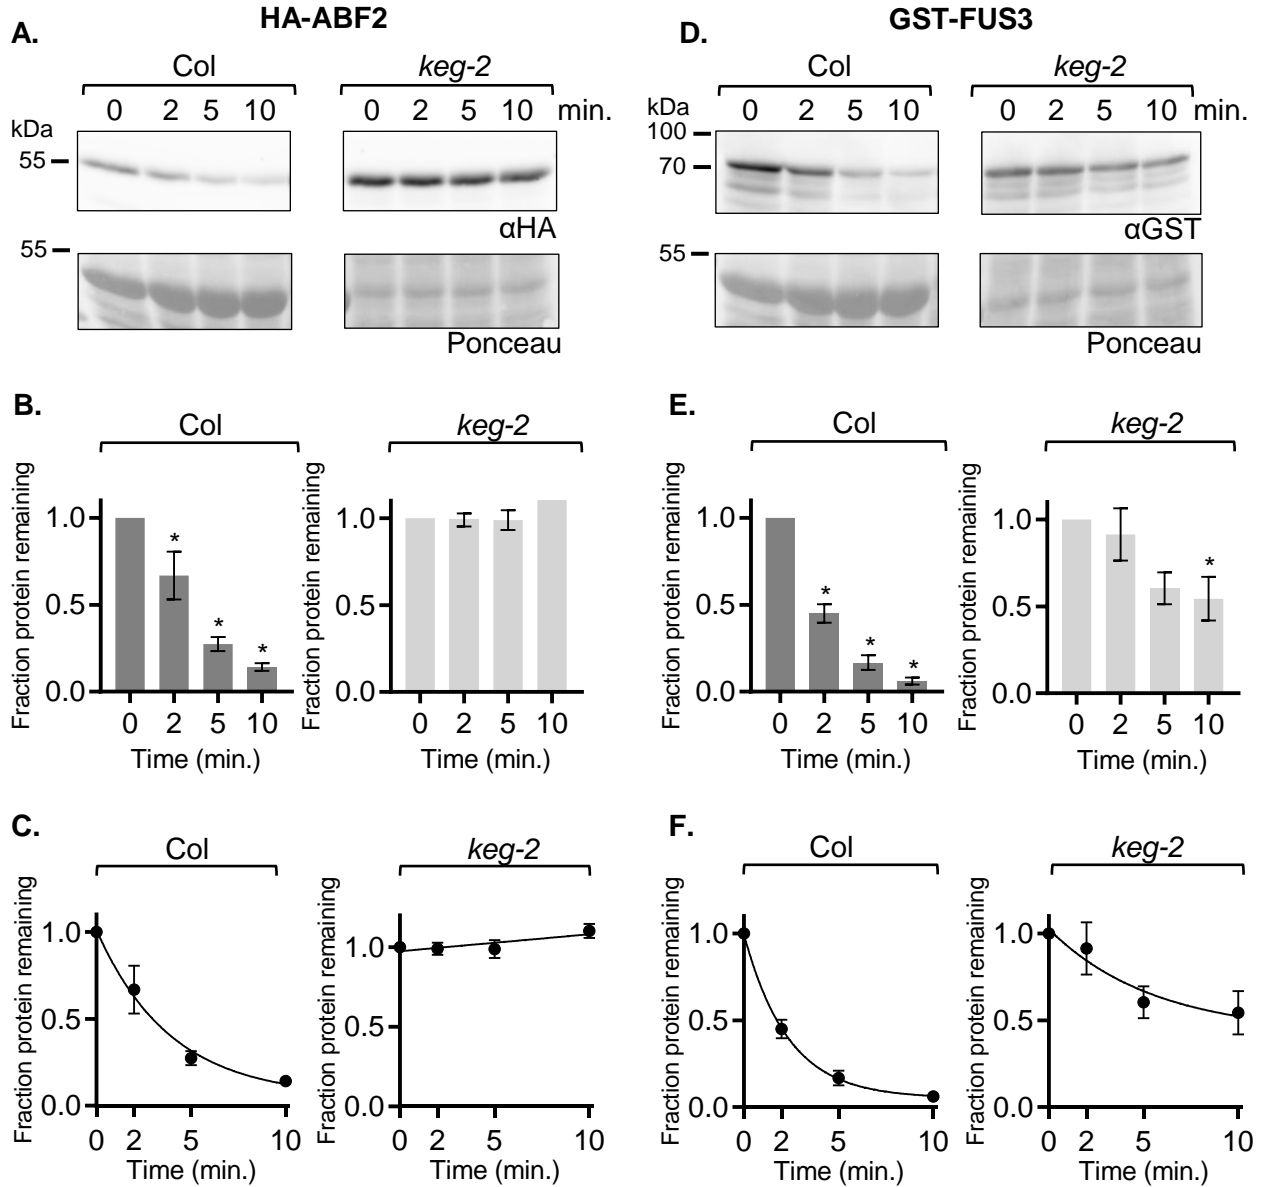

**Figure 5. ABF2 protein is stabilized in *keg-2* lysate *in vitro***

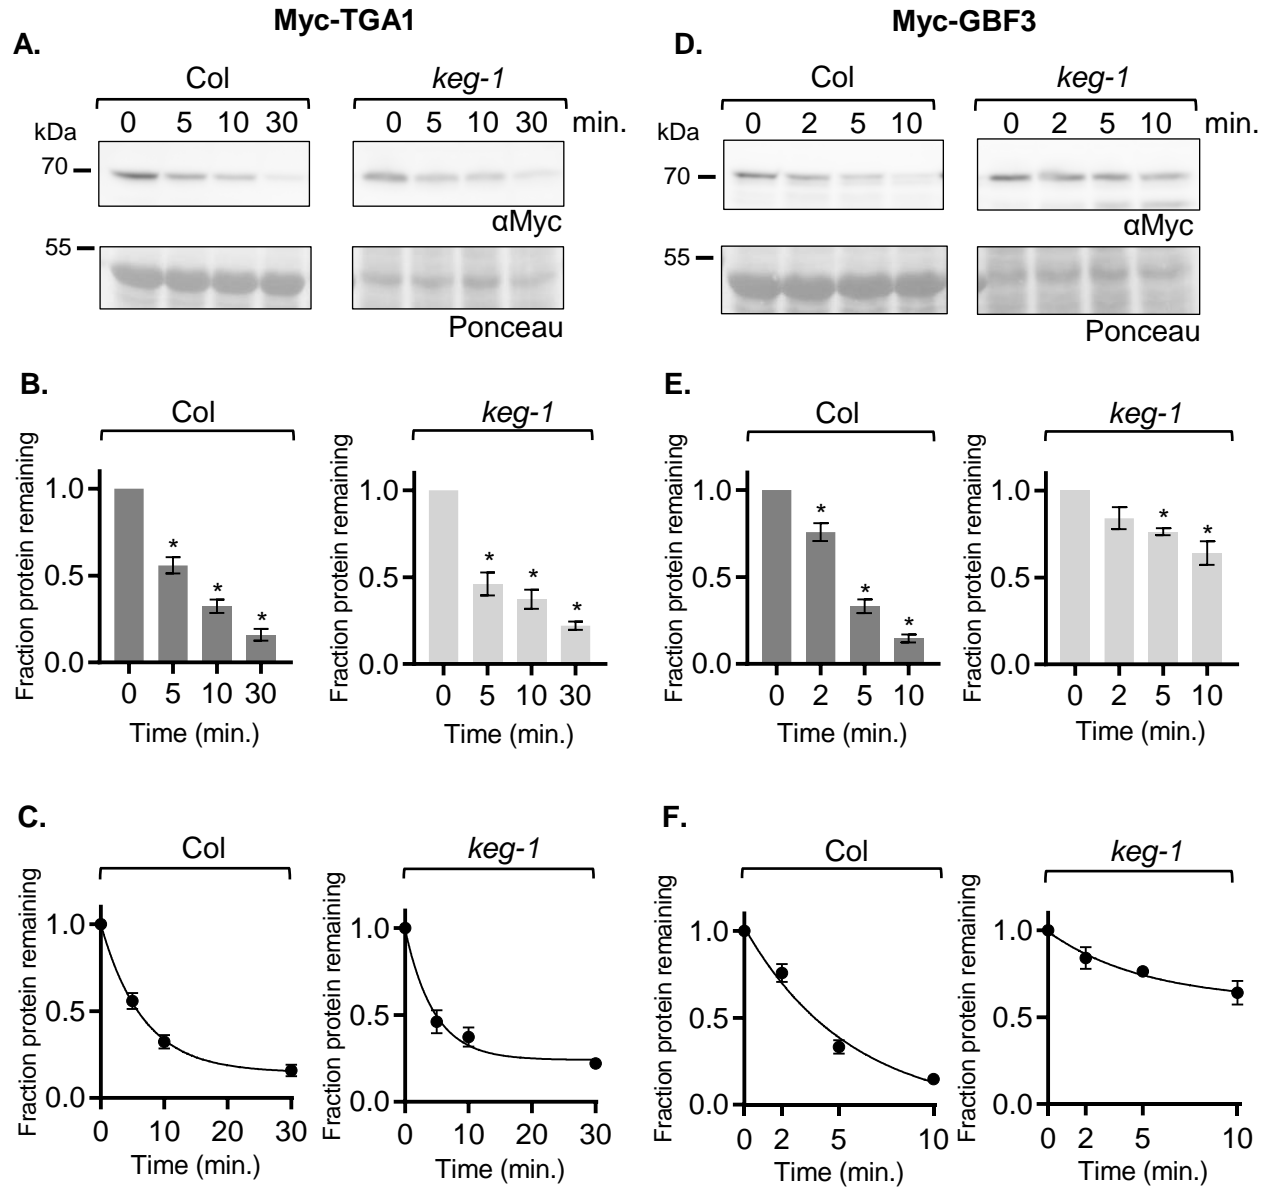

**Figure 6. The bZIP proteins TGA1 and GBF3 degrade in *keg-1* lysate *in vitro***

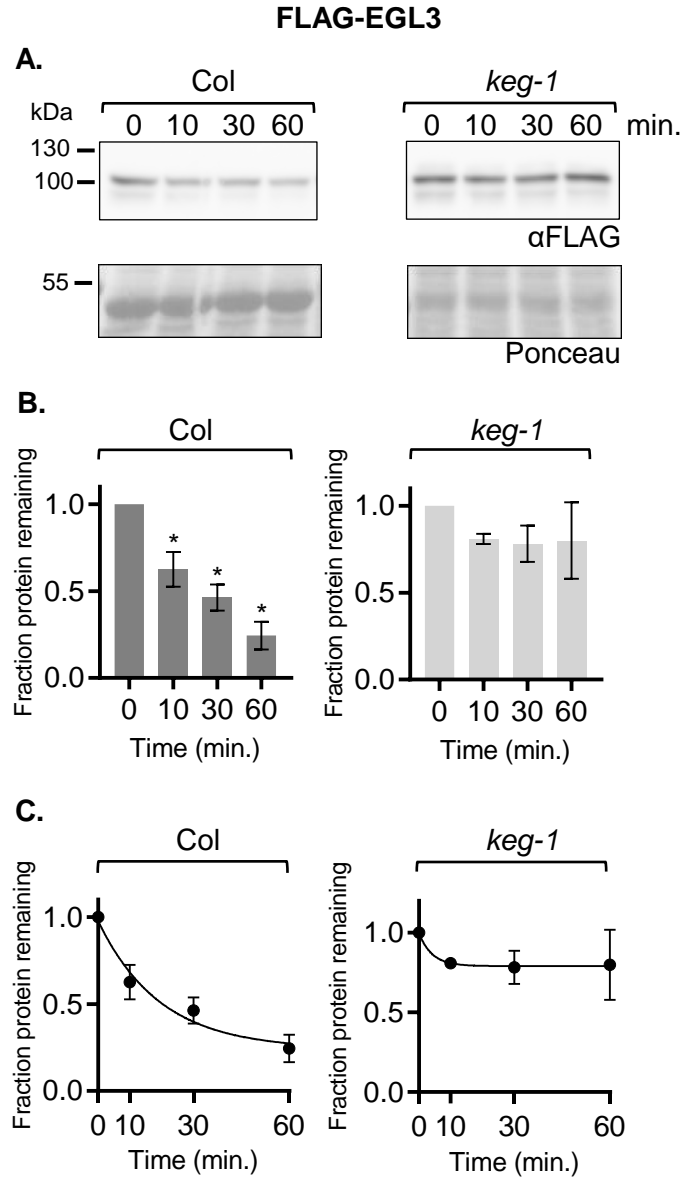

**Figure 7. The bHLH protein EGL3 does not degrade significantly in *keg-1* lysate *in vitro***

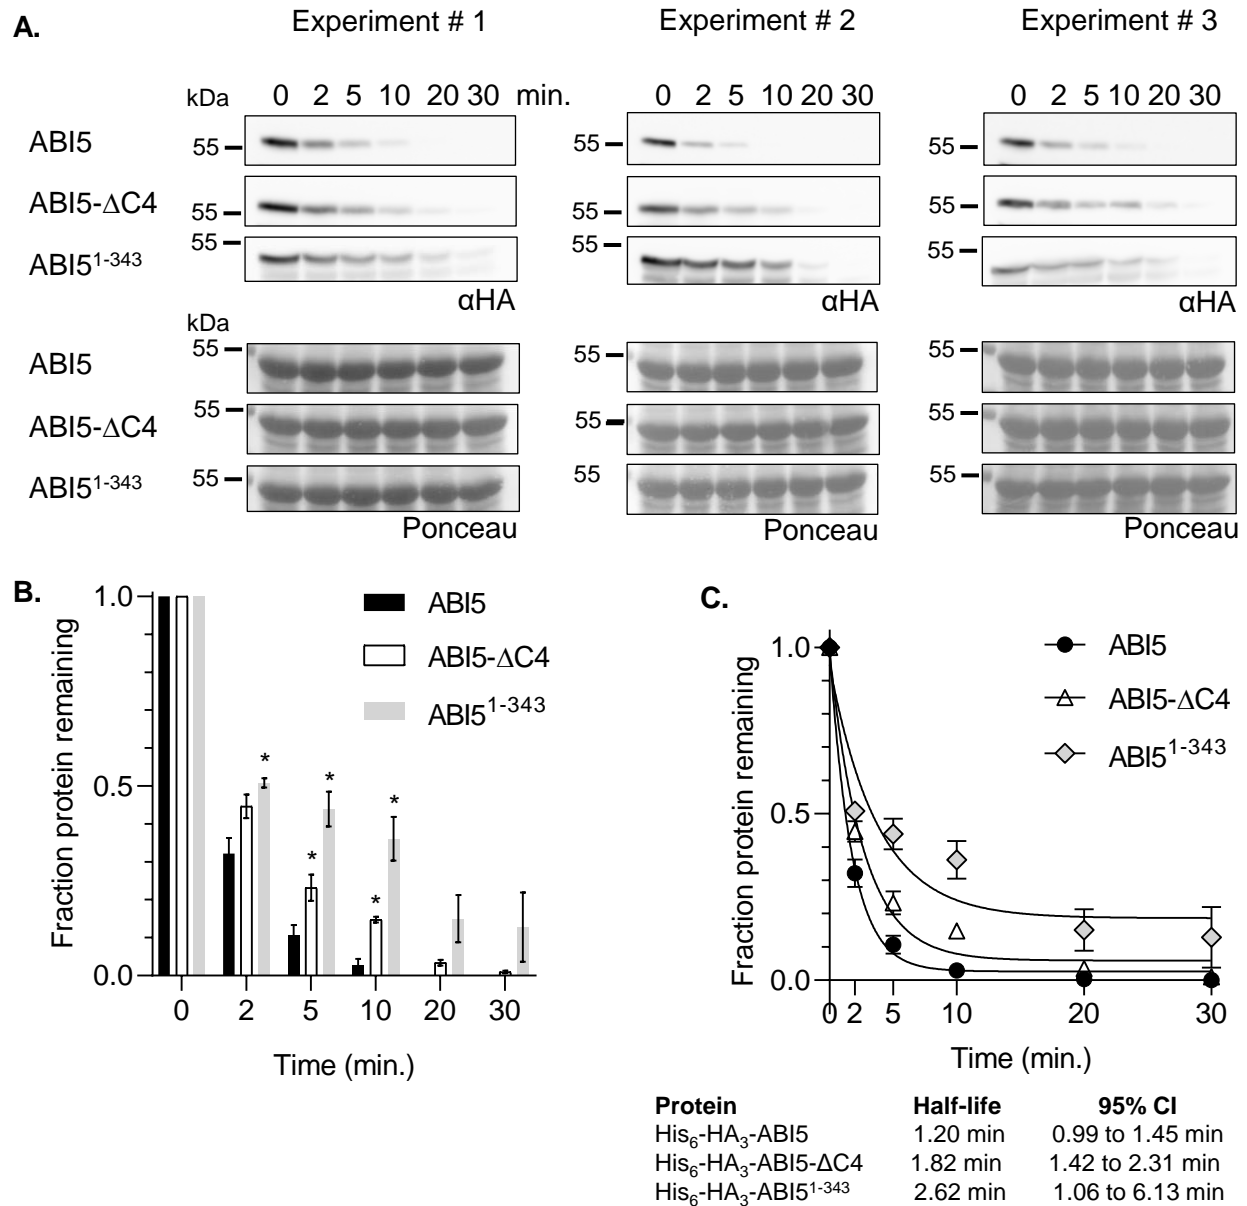

**Figure 8. ABI5<sup>1-343</sup> and ABI5-ΔC4 degrade more slowly than full-length ABI5 *in vitro***

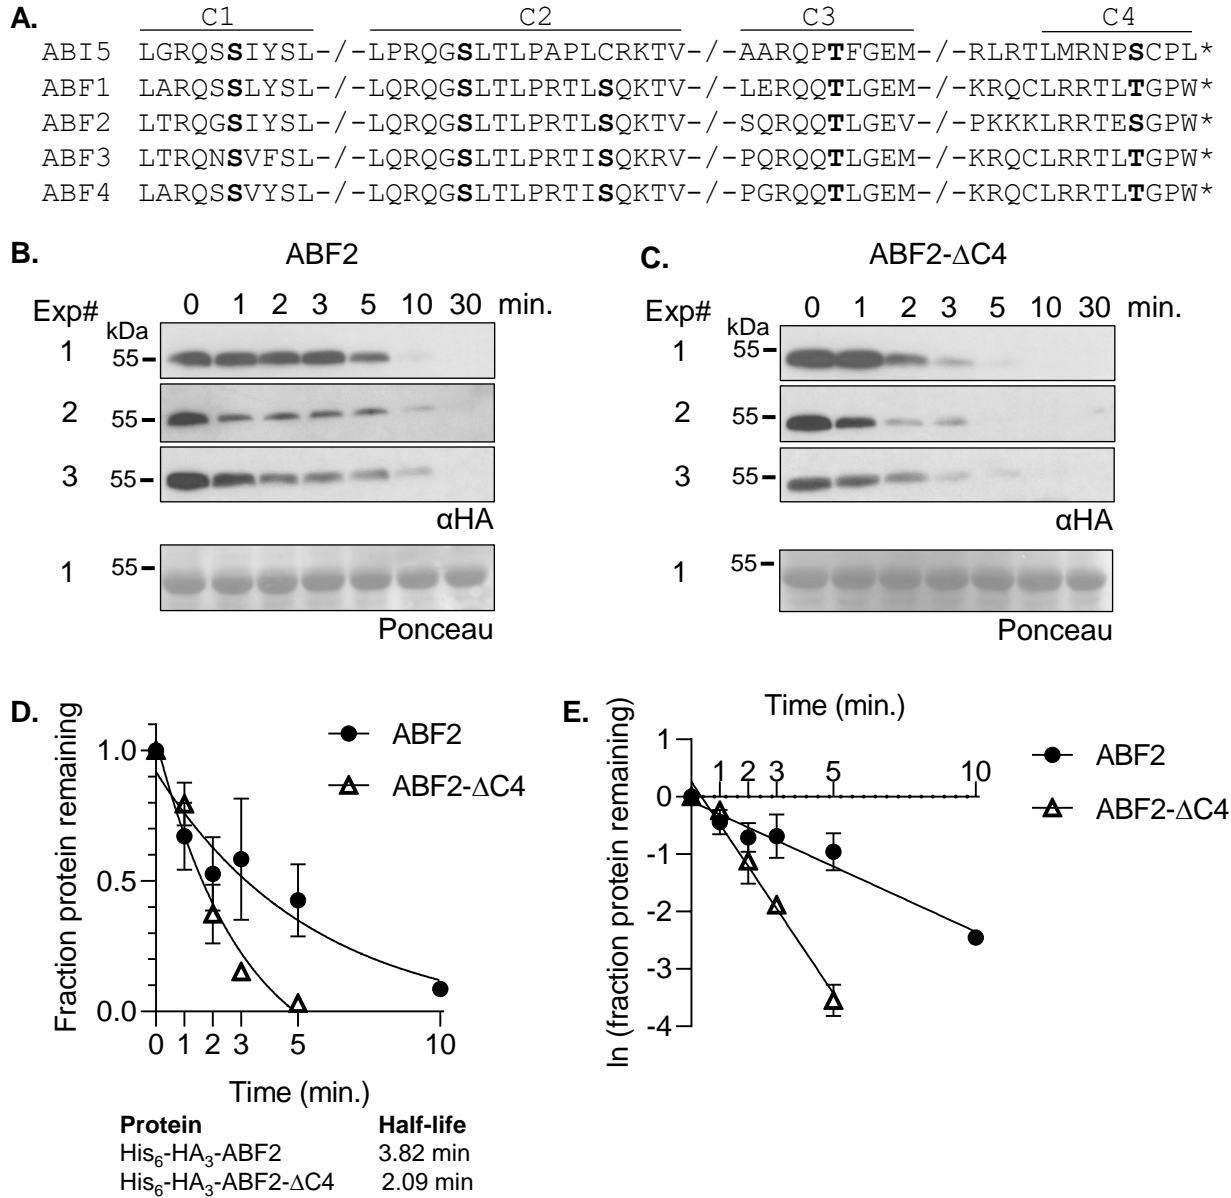

**Figure 9. ABF2 lacking the C4 region degrades faster than full-length ABF2 *in vitro***



**A.**

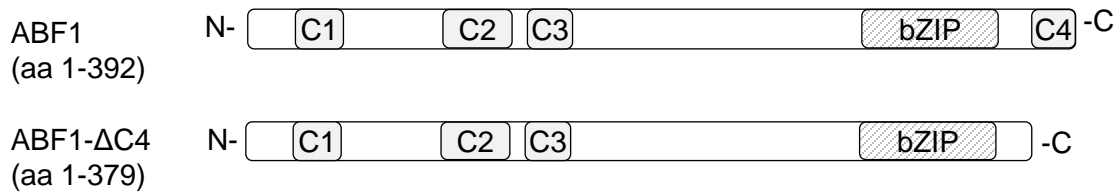

**B.**

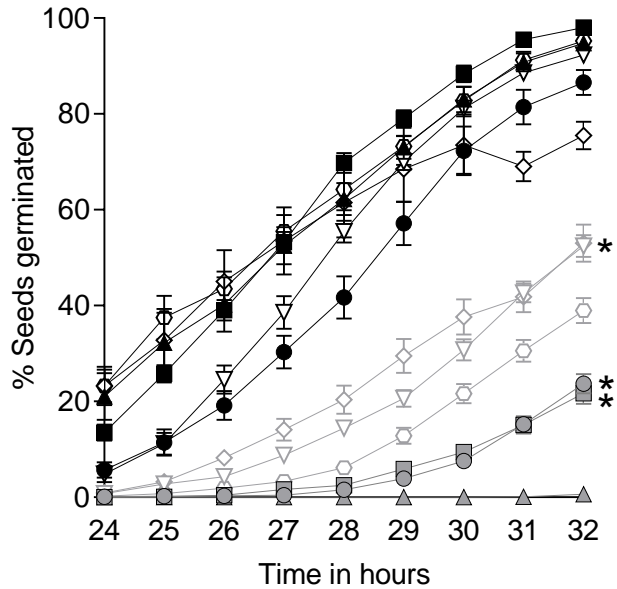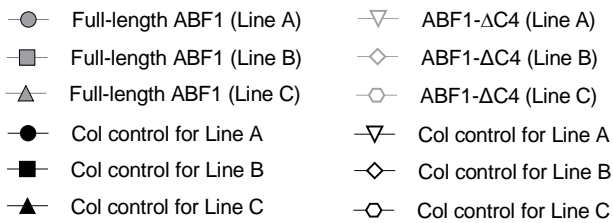

**C.**

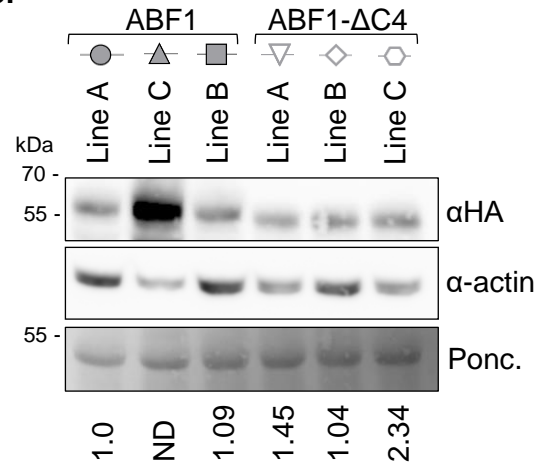

**Figure 10. Overexpression of full-length ABF1 or ABF1-ΔC4 delays germination**
